# Supplementary material for: The Biological and Chemical Diversity of Tetramic Acid Compounds from Marine-Derived Microorganisms
Source: PubMed Central journal article supplement (PMC7074263; doi:10.3390/md18020114), 2020-02-15
Supplement: marinedrugs-18-00114-s001.pdf [file marinedrugs-18-00114-s001.pdf]

# The Biological and Chemical Diversity of Tetramic Acid Compounds from Marine-Derived Microorganisms

Minghua Jiang<sup>1,2,†</sup>, Senhua Chen<sup>1,2,3,†,\*</sup>, Jing Li<sup>1,2,3</sup> and Lan Liu<sup>1,2,3,\*</sup>

<sup>1</sup> School of Marine Sciences, Sun Yat-sen University, Guangzhou 510006, China; jiangmh23@mail2.sysu.edu.cn; chensenh@mail.sysu.edu.cn; lijing356@mail.sysu.edu.cn  
cesllan@mail.sysu.edu.cn;

<sup>2</sup> South China Sea Bio-Resource Exploitation and Utilization Collaborative Innovation Center, Guangzhou 510006, China;

<sup>3</sup> Southern Laboratory of Ocean Science and Engineering (Guangdong, Zhuhai), Zhuhai 519000, China;

\* Correspondence: chensenh@mail.sysu.edu.cn.; cesllan@mail.sysu.edu.cn; Tel.: +86-020-84725459 (S.C. & L.L.)

† These authors contributed equally to this work.

**Table S1: The Tetramic Acid Compounds from Marine-Derived Microorganisms**

| Compound Name (NO.) | Isolate marine microorganisms                       | microorganisms category | Host/Origin and Location                                    | Biological Activity                                                                       | References |
|---------------------|-----------------------------------------------------|-------------------------|-------------------------------------------------------------|-------------------------------------------------------------------------------------------|------------|
| Magnesidin A (1)    | <i>Vibrio gazogenes</i> ATCC29988                   | Bacteria                | marine mud, unknown place                                   |                                                                                           | 17         |
|                     | <i>Pseudomonas magnesorubra</i> nov. sp. ATCC 21856 | Bacteria                | Marine alga, <i>Caulerpa peltata</i> , Bombay, India        | antibacterial                                                                             | 18         |
| Epicoccamide (2)    | <i>Epicoccum purpurascens</i>                       | Fungal                  | jellyfish <i>Aurelia aurita</i> , North Sea, Germany        | NF                                                                                        | 19         |
| Penicillenol A1 (3) | <i>Penicillium</i> sp. GQ-7                         | Fungal                  | mangrove <i>Aegiceras corniculatum</i> , Gaoqiao, China     | cytotox. vs. HL-60, A-549, BEL-7402, P388 (IC <sub>50</sub> = 0.76, 23.8, 13.03, 8.85 μM) | 20         |
|                     | <i>Penicillium citrinum</i>                         |                         | sediment, Min River, China                                  | mod. cytotox. vs. A375 (IC <sub>50</sub> = 12.8 μM)                                       | 24         |
|                     | <i>Xylariaceae</i> sp. SCSGAF0086                   |                         | gorgonian coral <i>Melitodes squamata</i> , South China Sea | anti-TB, 96.1% inhibition 10 μM                                                           | 25         |
|                     | <i>Aspergillus restrictus</i> DFFSCS006             |                         | marine sediment, South China Sea                            | inhibit biofilm formation of <i>Candida albicans</i> , inhibitory rate 38% at 50 μg/mL    | 26         |
| Penicillenol A2 (4) | <i>Penicillium</i> sp. GQ-7                         | Fungal                  | mangrove <i>Aegiceras corniculatum</i> , Gaoqiao, China     | cytotox. vs. HL-60 (IC <sub>50</sub> = 16.26 μM)                                          | 20         |
|                     | <i>Penicillium citrinum</i>                         |                         | sediment, Min River, China                                  | weak cytotox. vs. A375 (IC <sub>50</sub> = 44.6 μM)                                       | 24         |
|                     | <i>Xylariaceae</i> sp. SCSGAF0086                   |                         | gorgonian coral <i>Melitodes squamata</i> , South China Sea | -                                                                                         | 25         |

|                      |                                         |        |                                                         |                                                                                        |    |
|----------------------|-----------------------------------------|--------|---------------------------------------------------------|----------------------------------------------------------------------------------------|----|
|                      | <i>Aspergillus restrictus</i> DFFSCS006 |        | marine sediment, South China Sea                        | inhibit biofilm formation of <i>Candida albicans</i> , inhibitory rate 81% at 50 µg/mL | 26 |
| Penicillenol B1 (5)  | <i>Penicillium</i> sp. GQ-7             | Fungal | mangrove <i>Aegiceras corniculatum</i> , Gaoqiao, China | cytotox. vs. HL-60 (IC <sub>50</sub> =3.20µM)                                          | 20 |
|                      | <i>Penicillium citrinum</i>             |        | sediment, Min River, China                              | mod. cytotox. vs A375, (IC <sub>50</sub> =10 µM)                                       | 24 |
|                      | <i>Aspergillus restrictus</i> DFFSCS006 |        | marine sediment, South China Sea                        | inhibit biofilm formation of <i>Candida albicans</i> , inhibitory rate 75% at 50 µg/mL | 26 |
|                      |                                         |        |                                                         | antibacterial vs. <i>Staphylococcus aureus</i> , abs. config. Assigned                 | 23 |
| Penicillenol B2 (6)  | <i>Penicillium</i> sp. GQ-7             | Fungal | mangrove <i>Aegiceras corniculatum</i> , Gaoqiao, China | cytotox. vs. HL-60 (IC <sub>50</sub> =7.65 µM)                                         | 20 |
|                      | <i>Penicillium citrinum</i>             |        | sediment, Min River, China                              | mod. cytotox. vs A375 (IC <sub>50</sub> = 3.46 µM)                                     | 24 |
|                      | <i>Aspergillus restrictus</i> DFFSCS006 |        | marine sediment, South China Sea                        | inhibit biofilm formation of <i>Candida albicans</i> , inhibitory rate 54% at 50 µg/mL | 26 |
|                      |                                         |        |                                                         | antibacterial vs. <i>Staphylococcus aureus</i> , abs. config. Assigned                 | 23 |
| Penicillenol C1 (7)  | <i>Penicillium</i> sp. GQ-7             | Fungal | mangrove <i>Aegiceras corniculatum</i> , Gaoqiao, China | no cytotox.                                                                            | 20 |
|                      | <i>Aspergillus restrictus</i> DFFSCS006 |        | marine sediment, South China Sea                        | -                                                                                      | 26 |
| Penicillenol C2 (8)  | <i>Penicillium</i> sp. GQ-7             | Fungal | mangrove <i>Aegiceras corniculatum</i> , Gaoqiao, China | no cytotox.                                                                            | 20 |
|                      | <i>Aspergillus restrictus</i> DFFSCS006 |        | marine sediment, South China Sea                        | inhibit biofilm formation of <i>Candida albicans</i> , inhibitory rate 58% at 50 µg/mL | 26 |
| Penicillenol D (9)   | <i>Trichoderma citrinoviride</i>        | Fungal | marine sediments, Langqi Island, Fujian, China          | cytotox. vs. A-375 ( IC <sub>50</sub> =32.6µM)                                         | 21 |
| Penicillenol D1 (10) | <i>Penicillium citrinum</i>             | Fungal | marine sediments, Langqi Island, Fujian, China          | weak cytotox. vs. A-549, HL-60                                                         | 22 |
| Penicillenol D2 (11) | <i>Penicillium citrinum</i>             | Fungal | marine sediments, Langqi Island, Fujian, China          | weak cytotox. vs. A-549, HL-60                                                         | 22 |
| Penicitrinine A (12) | <i>Penicillium citrinum</i>             | Fungal | marine sediments, Langqi Island, Fujian, China          | stronger cytotox. than p.c., via cell apoptosis                                        | 27 |

|                        |                                                  |        |                                                        |                                                                                            |        |
|------------------------|--------------------------------------------------|--------|--------------------------------------------------------|--------------------------------------------------------------------------------------------|--------|
| Chaunolidine A (13)    | <i>Chaunopycnis</i> sp. (CMB-MF028)              | Fungal | marine <i>Siphonaria</i> sp.,<br>Queensland, Australia | metal chelation capacity                                                                   | 28     |
| Chaunolidine B (14)    | <i>Chaunopycnis</i> sp. (CMB-MF028)              | Fungal | marine <i>Siphonaria</i> sp.,<br>Queensland, Australia | metal chelation capacity                                                                   | 28     |
| Chaunolidine C (15)    | <i>Chaunopycnis</i> sp. (CMB-MF028)              | Fungal | marine <i>Siphonaria</i> sp.,<br>Queensland, Australia | modest Gram-positive antibacterial (IC <sub>50</sub> = 5– 10 µM), metal chelation capacity | 28     |
| F-14329 (16)           | <i>Chaunopycnis</i> sp. (CMB-MF028)              | Fungal | marine <i>Siphonaria</i> sp.,<br>Queensland, Australia | antilipidemic effect, metal chelation capacity                                             | 28, 29 |
| Tolypocladenol A1 (17) | <i>Tolypocladium geodes</i> sp. MF458            | Fungal | marine sponge, unknown<br>place                        | NF                                                                                         | 30     |
| Tolypocladenol A2 (18) | <i>Tolypocladium geodes</i> sp. MF458            | Fungal | marine sponge, unknown<br>place                        | NF                                                                                         | 30     |
| Tolypocladenol C (19)  | <i>Tolypocladium geodes</i> sp. MF458            | Fungal | marine sponge, unknown<br>place                        | NF                                                                                         | 30     |
| Cladosporiumin E (20)  | <i>Cladosporium</i> sp. SCSIO z0025              | Fungal | deep-sea sediment,<br>Okinawa Trough, Japan            | NF                                                                                         | 31     |
| Cladosporiumin F (21)  | <i>Cladosporium</i> sp. SCSIO z0025              | Fungal | deep-sea sediment,<br>Okinawa Trough, Japan            | NF                                                                                         | 31     |
| Cladosporiumin G (22)  | <i>Cladosporium</i> sp. SCSIO z0025              | Fungal | deep-sea sediment,<br>Okinawa Trough, Japan            | NF                                                                                         | 31     |
| Cladosporiumin H (23)  | <i>Cladosporium</i> sp. SCSIO z0025              | Fungal | deep-sea sediment,<br>Okinawa Trough, Japan            | NF                                                                                         | 31     |
| Cladosporiumin N (24)  | <i>Cladosporium sphaerospermum</i><br>EIODSF 008 | Fungal | deep-sea sediment, East<br>Indian Ocean                | NF                                                                                         | 32     |
| Cladosporiumin O (25)  | <i>Cladosporium sphaerospermum</i><br>EIODSF 008 | Fungal | deep-sea sediment, East<br>Indian Ocean                | NF                                                                                         | 32     |
| Cladosporiumin L (26)  | <i>Cladosporium sphaerospermum</i><br>EIODSF 008 | Fungal | deep-sea sediment, East<br>Indian Ocean                | NF                                                                                         | 32     |
| 18-OH-RKB-3384A (27)   | <i>Aspergillus</i> sp. OUCMDZ-1914               | Fungal | Mangrove Soils, Wenchang<br>Hainan, China              | NF                                                                                         | 33     |
| RKB-3384A (28)         | <i>Aspergillus</i> sp. OUCMDZ-1914               | Fungal | Mangrove Soils, Wenchang<br>Hainan, China              | anti-virus (H1N1 influenza virus), (IC <sub>50</sub> =116.2 µM).                           | 33     |
| Cladosporiumin M (29)  | <i>Cladosporium sphaerospermum</i><br>EIODSF 008 | Fungal | deep-sea sediment, East<br>Indian Ocean                | NF                                                                                         | 32     |

|                        |                                                |              |                                                   |                                                                                    |    |
|------------------------|------------------------------------------------|--------------|---------------------------------------------------|------------------------------------------------------------------------------------|----|
| Tirandamycin A (30)    | <i>Streptomyces</i> sp. 307-9                  | Actinomycete | marine sediments, Virgin Islands, USA             | -                                                                                  | 38 |
|                        | <i>Streptomyces tirandamycinicus</i> sp. nov.  |              | Marine Sponge, Wenchang, Hainan, China            | antibacterial vs. <i>Streptococcus agalactiae</i> (MIC=2.52 µg/mL)                 | 39 |
|                        | <i>Streptomyces</i> sp. SCSIO 1666             |              | marine sediments, South China Sea                 | -                                                                                  | 37 |
|                        | <i>Streptomyces</i> sp. URI-F11                |              | marine sediments, Fisher's Island Sound, NY, USA  | antiamoebic, (EC <sub>50</sub> =44.3–46.3µM)                                       | 41 |
|                        | <i>Streptomyces</i> sp. SCSIO 41399            |              | <i>Porites</i> sp. Coral, Wenchang, Hainan, China | potent antibacterial vs. <i>Streptococcus agalactiae</i> ( MIC= 5.9 µM)            | 42 |
|                        |                                                |              |                                                   | antibacterial inhibits chain initiation and elongation of Bacterial RNA polymerase | 34 |
| Tirandamycin B (31)    | <i>Streptomyces</i> sp. 307-9                  | Actinomycete | marine sediments, Virgin Islands, USA             |                                                                                    | 38 |
|                        | <i>Streptomyces tirandamycinicus</i> sp. nov., |              | Marine Sponge, Wenchang, Hainan, China            | antibacterial vs. <i>Streptococcus agalactiae</i> (MIC=2.55µg/mL)                  | 39 |
|                        | <i>Streptomyces</i> sp. SCSIO 1666             |              | marine sediments, South China Sea                 |                                                                                    | 37 |
|                        | <i>Streptomyces</i> sp. SCSIO 41399            |              | <i>Porites</i> sp. Coral, Wenchang, Hainan, China | potent antibacterial effects vs. <i>Streptococcus agalactiae</i> (MIC= 5.7µM)      | 42 |
|                        |                                                |              |                                                   | inhibited the parasitic nematode <i>Brugia malayi</i> at 30 µM                     | 40 |
| Tirandamycin C (32)    | <i>Streptomyces</i> sp. 307-9                  | Actinomycete | marine sediments, Virgin Islands, USA             | antibacterial including Gram-negative and VRE, MRSEs, ( MICs 0.78–25µM)            | 46 |
|                        | <i>Streptomyces</i> sp. SCSIO 1666             |              | marine sediments, South China Sea                 | -                                                                                  | 37 |
| Tirandamycin D (33)    | <i>Streptomyces</i> sp. 307-9                  | Actinomycete | marine sediments, Virgin Islands, USA             | antibacterial                                                                      | 46 |
|                        | <i>Streptomyces</i> sp. SCSIO 1666             |              | marine sediments, South China Sea                 | -                                                                                  | 37 |
| Isotirandamycin B (34) | <i>Streptomyces</i> sp. SCSIO 41399            | Actinomycete | <i>Porites</i> sp. Coral, Wenchang, Hainan, China | potent antibacterial effects vs. <i>Streptococcus agalactiae</i> (MIC= 11.5µM)     | 42 |
| Tirandamycin E (35)    | <i>Streptomyces</i> sp. SCSIO 1666             | Actinomycete | marine sediments, South China Sea                 | -                                                                                  | 43 |

|                              |                                      |              |                                                         |                                                                                                                |      |
|------------------------------|--------------------------------------|--------------|---------------------------------------------------------|----------------------------------------------------------------------------------------------------------------|------|
| Tirandamycin F (36)          | <i>Streptomyces</i> sp. SCSIO 1666   | Actinomycete | marine sediments, South China Sea                       | -                                                                                                              | 43   |
| Tirandamycin C2 (37)         | <i>Streptomyces</i> sp. SCSIO 1666   | Actinomycete | marine sediments, South China Sea                       | -                                                                                                              | 44   |
| Pre-tirandamycin (38)        | <i>Streptomyces</i> sp. SCSIO 1666   | Actinomycete | marine sediments, South China Sea                       | -                                                                                                              | 45   |
| Tirandamycin K (39)          | <i>Streptomyces</i> sp. 307-9        | Actinomycete | marine sediments, Virgin Islands, USA                   | NF                                                                                                             | 46   |
| Equisetin (40)               | <i>Fusarium equiseti</i> D39         | Fungal       | unidentified mangrove plant, Yellow Sea, Qingdao, China | remarkable anti-phytopathogenic Bacterial and Fungal activities superior to the p.c., obvious phytotoxicity    | 47   |
|                              | <i>Fusarium</i> sp. 152              |              | deep-sea sediment, South China Sea                      | anti-MRSA (MIC = 1 µg/mL), antimicrobial, anti-HIV, cytotoxicity, phytotoxicity                                | 48,7 |
| epi-Equisetin (41)           | <i>Fusarium equiseti</i> D39         | Fungal       | unidentified plant, Yellow Sea, Qingdao, China          | remarkable anti-phytopathogenic Bacterial and Fungal activities superior to the p.c., obvious phytotoxicity    | 47   |
|                              | <i>Fusarium</i> sp. 152              |              | deep-sea sediment, South China Sea                      | -                                                                                                              | 48   |
| Ascosalipyrrolidinone A (42) | <i>Ascochyta salicorniae</i>         | Fungal       | green alga <i>Ulva</i> sp., North Sea, To'nnig, Germany | antiplasmodial, antifungal, antibacterial, and inhibiting tyrosine kinase p56lck (anti-HIV).                   | 49   |
| Ascosalipyrrolidinone B (43) | <i>Ascochyta salicorniae</i>         | Fungal       | green alga <i>Ulva</i> sp., North Sea, To'nnig, Germany | -                                                                                                              | 49   |
| Zopfiellamide A (44)         | <i>zopfiella latipes</i> CBS 611.97. | Fungal       | soil sample, Indian Ocean                               | mod. antibacterial, MIC 2-10µg/mL, antifungal, MIC=2µg/mL                                                      | 50   |
| Zopfiellamide B (45)         | <i>zopfiella latipes</i> CBS 611.97. | Fungal       | soil sample, Indian Ocean                               | very weak antibacterial, antifungal, MIC=2µg/mL                                                                | 50   |
| Sch210972 (46)               | <i>Microdiplodia</i> sp.             | Fungal       | seaweed, North Sea, Germany                             | inhibits human leucocyte elastase (IC <sub>50</sub> = 1.04 µg/mL), mod. antibacterial vs. <i>B. megaterium</i> | 51   |
|                              |                                      |              |                                                         | Chemokine Receptor CCR-5 Inhibitor, IC <sub>50</sub> = 79 nM                                                   | 52   |
| Beauversetin (47)            | <i>Beauveria bassiana</i>            | Fungal       | sponge <i>Myxilla incrustans</i> , North Sea, Germany   | mod. cytotox. of 6 HCLs, IC <sub>50</sub> 3.09µg/mL                                                            | 51   |
| Trichobotrysin A (48)        | <i>Trichobotrys effuse</i> DFFSCS021 | Fungal       | deep-sea sediment, South China Sea                      | cytotox. vs. KG-1a, IC <sub>50</sub> =5.44µM, antiviral vs. HSV-1, IC <sub>50</sub> = 3.08µM,                  | 53   |
| Trichobotrysin B (49)        | <i>Trichobotrys effuse</i> DFFSCS021 | Fungal       | deep-sea sediment, South China Sea                      | cytotox. vs. KG-1a, IC <sub>50</sub> =8.97µM, antiviral vs. HSV-1, IC <sub>50</sub> = 9.37µM,                  | 53   |
| Trichobotrysin C (50)        | <i>Trichobotrys effuse</i> DFFSCS021 | Fungal       | deep-sea sediment, South China Sea                      | cytotox. vs. KG-1a and antiviral t vs. HSV-1, IC <sub>50</sub> <20µM                                           | 53   |

|                         |                                        |              |                                                               |                                                                                                                                               |       |
|-------------------------|----------------------------------------|--------------|---------------------------------------------------------------|-----------------------------------------------------------------------------------------------------------------------------------------------|-------|
| Trichobotrysin D (51)   | <i>Trichobotrys effuse</i> DFFSCS021   | Fungal       | deep-sea sediment, South China Sea                            | cytotox. vs. KG-1a, IC <sub>50</sub> = 6.16μM, mod. cytotox. 4 HCLs, IC <sub>50</sub> <40 μM, antiviral vs. HSV-1, IC <sub>50</sub> = 3.12μM, | 53    |
| Trichobotrysin E (52)   | <i>Trichobotrys effuse</i> DFFSCS021   | Fungal       | deep-sea sediment, South China Sea                            | NF                                                                                                                                            | 53    |
| Lindgomycin (53)        | <i>Lindgomycetaceae</i> KF970          | Fungal       | the sponge of the <i>Kiel Fjord</i> , Baltic Sea, Germany     | anti-Bacterial including <i>MRSA</i> and Fungal activities, IC <sub>50</sub> = 2.2–17.8 μM                                                    | 54    |
| Ascosetin (54)          | <i>Lindgomycetaceae</i> LF327          | Fungal       | the Antarctic                                                 | antibacterial including <i>MRSA</i> and Fungal activities, IC <sub>50</sub> = 2.8–14.8 μM                                                     | 54    |
|                         |                                        |              |                                                               | antibacterial (G+) including <i>MRSA</i> (MIC 2–16μg/mL ), antibacterial (G-) <i>haemophilus influenzae</i> ( MIC 8 μg/mL)                    | 55    |
| Iqalisetin A (55)       | <i>Tolypocladium</i> sp.               | Fungal       | marine sediment, Frobisher Bay, Nunavut, Canada               | NF                                                                                                                                            | 56    |
| Iqalisetin B (56)       | <i>Tolypocladium</i> sp.               | Fungal       | marine sediment, Frobisher Bay, Nunavut, Canada               | NF                                                                                                                                            | 56    |
| Lydicamycin (57)        | <i>Streptomyces platensis</i> TP-A0598 | Actinomycete | seawater sample, Toyama Bay, Japan,                           | antibacterial vs. Gram-positive Bacteria including <i>MRSA</i> , MIC 0.78-6.25μg/mL                                                           | 57,68 |
| TPU-0037-A (58)         | <i>Streptomyces platensis</i> TP-A0598 | Actinomycete | seawater sample, Toyama Bay, Japan,                           | antibacterial vs. Gram-positive Bacteria including <i>MRSA</i> , MIC 1.56-12.5μg/mL                                                           | 57    |
| TPU -0037-B (59)        | <i>Streptomyces platensis</i> TP-A0598 | Actinomycete | seawater sample, Toyama Bay, Japan,                           | antibacterial vs. Gram-positive Bacteria including <i>MRSA</i> , MIC 6.25-12.5μg/mL                                                           | 57    |
| TPU -0037-C (60)        | <i>Streptomyces platensis</i> TP-A0598 | Actinomycete | seawater sample, Toyama Bay, Japan,                           | antibacterial vs. Gram-positive Bacteria including <i>MRSA</i> , MIC 0.39-3.13μg/mL                                                           | 57    |
| TPU -0037-D (61)        | <i>Streptomyces platensis</i> TP-A0598 | Actinomycete | seawater sample, Toyama Bay, Japan,                           | antibacterial vs. Gram-positive Bacteria including <i>MRSA</i> , MIC 0.78-12.5μg/mL                                                           | 57    |
| Streptosetin A (62)     | Actinomycete strain (CP13-10)          | Actinomycete | marine sediment, San Francisco Bay, USA                       | weak inhibitory vs. yeast Sir2p and human SIRT1 and SIRT2.                                                                                    | 59    |
| Cladosporitin A (63)    | <i>Cladosporium</i> sp. HNWSW-1        | Fungal       | mangrove root of <i>Ceriops tagal</i> , Hainan China          | NF                                                                                                                                            | 60    |
| Cladosporitin B (64)    | <i>Cladosporium</i> sp. HNWSW-1        | Fungal       | mangrove root of <i>Ceriops tagal</i> , Hainan China          | cytotox. vs. BEL-7042, K562, SGC-7901, IC <sub>50</sub> =25–42.4 μM                                                                           | 60    |
| Talaroconvolutin A (65) | <i>Cladosporium</i> sp. HNWSW-1        | Fungal       | mangrove root of <i>Ceriops tagal</i> , Hainan China          | cytotox. vs. Hela, BEL-7042, IC <sub>50</sub> =14.7–27.8 μM, inhibit α-glycosidase, IC <sub>50</sub> =78.2 μM                                 | 60    |
| Altercrasin A (66)      | <i>Alternaria</i> sp. OUPS-117D-1      | Fungal       | sea urchin <i>Anthocidaris crassispina</i> , Osaka bay, Japan | Mod. cytotox. vs. P388, HL-60, L1210 (IC <sub>50</sub> = 36.2, 21.5, 22.1μM)                                                                  | 61,62 |

|                    |                                           |          |                                                               |                                                                                                 |       |
|--------------------|-------------------------------------------|----------|---------------------------------------------------------------|-------------------------------------------------------------------------------------------------|-------|
| Altercrasin B (67) | <i>Alternaria</i> sp. OUPS-117D-1         | Fungal   | sea urchin <i>Anthocidaris crassispina</i> , Osaka bay, Japan | cytotox. vs. P388, HL-60, L1210 (IC <sub>50</sub> = 20, 12, 8μM)                                | 62    |
| Altercrasin C (68) | <i>Alternaria</i> sp. OUPS-117D-1         | Fungal   | sea urchin <i>Anthocidaris crassispina</i> , Osaka bay, Japan | mod. cytotox. vs. P388, HL-60, L1210 (IC <sub>50</sub> =27–62μM)                                | 62    |
| Altercrasin D (69) | <i>Alternaria</i> sp. OUPS-117D-1         | Fungal   | sea urchin <i>Anthocidaris crassispina</i> , Osaka bay, Japan | cytotox. vs. L1210 (IC <sub>50</sub> = 8.4μM) PC388–9.7μM, HL-60– 6.1μM equal to 5-fluorouracil | 62    |
| Altercrasin E (70) | <i>Alternaria</i> sp. OUPS-117D-1         | Fungal   | sea urchin <i>Anthocidaris crassispina</i> , Osaka bay, Japan | cytotox. vs. P388, L1210, HL-60 (IC <sub>50</sub> = 15.5, 10.3, 6.2 μM)                         | 62    |
| Fusarisetin A (71) | <i>Fusarium equiseti</i> D39              | Fungal   | unidentified plant, Yellow Sea, Qingdao, China                | prominent phytotoxicity, potent inhibition of metastasis in MDAMB-231, significant cytotox.     | 47    |
|                    |                                           |          |                                                               | acinar morphogenesis inhibitor, cancer migration inhibitor                                      | 63-65 |
| Fusarisetin B (72) | <i>Fusarium equiseti</i> D39              | Fungal   | unidentified plant, Yellow Sea, Qingdao, China                | potent phytotoxicity,                                                                           | 47    |
|                    |                                           |          |                                                               | cancer migration inhibitor                                                                      | 64,65 |
| Fusarisetin C (73) | <i>Fusarium equiseti</i> D39              | Fungal   | unidentified plant, Yellow Sea, Qingdao, China                | potent phytotoxicity,                                                                           | 47    |
| Fusarisetin D (74) | <i>Fusarium equiseti</i> D39              | Fungal   | unidentified plant, Yellow Sea, Qingdao, China                | potent phytotoxicity,                                                                           | 47    |
| Pseurotin A (75)   | <i>Aspergillus fumigatus</i> CUGBMF17018  | Fungal   | marine sediment, Bohai Sea, China                             | no antibacterial                                                                                | 97    |
|                    | <i>Aspergillus fumigatus</i> MR2012       | Fungal   | Red Sea sediment, Hurghada, Egypt                             |                                                                                                 | 89    |
|                    | <i>Bacillus</i> sp. FS8D                  | Bacteria | marine animal <i>Lepas anatifera</i>                          | cytotox. vs. 4 glioma cells, IC <sub>50</sub> =0.51–29.3μM                                      | 71    |
|                    | <i>Aspergillus fumigatus</i> (030402d)    | Fungal   | deep-sea sediment, Vanuatu                                    |                                                                                                 | 67    |
|                    | <i>Aspergillus Fumigati</i>               | Fungal   | sediment, Northeast Coast, Brazil                             |                                                                                                 | 69    |
|                    | <i>Aspergillus fumigatus</i> OUPS-T106B-5 | Fungal   | marine fish <i>Mugil cephalus</i> , Katsuura Bay, Japan       |                                                                                                 | 85    |

|                                |                                               |        |                                                                             |                                                                                                                                                                                                                                                |       |
|--------------------------------|-----------------------------------------------|--------|-----------------------------------------------------------------------------|------------------------------------------------------------------------------------------------------------------------------------------------------------------------------------------------------------------------------------------------|-------|
|                                | <i>Aspergillus sydowii</i> PFW1-13            | Fungal | driftwood sample,<br>Baishamen, Hainan, China                               | significant antibacterial activities vs. <i>E. coli</i> , <i>B. subtilis</i> , <i>M. lysodeikticus</i> ,<br>MIC=14.49, 14.49, 7.24 $\mu$ M                                                                                                     | 68    |
|                                | <i>Aspergillus fumigatus</i> YK-7             | Fungal | marine mud, Bo Hai, China                                                   | mod. cytotox. vs. U397, IC <sub>50</sub> = 55.9 $\mu$ M                                                                                                                                                                                        | 83    |
|                                | <i>Aspergillus fumigatus</i> WFZ-25           | Fungal | holothurian <i>Stichopus japonicus</i> , Lingshan Island,<br>Qingdao, China |                                                                                                                                                                                                                                                | 84    |
|                                | <i>Aspergillus fumigatus</i>                  | Fungal | giant jellyfish <i>Neopilema nomurai</i> , Korea                            |                                                                                                                                                                                                                                                | 88    |
|                                |                                               |        |                                                                             | monoamine oxidase inhibitory, apomorphine-antagonistic, chitin synthase<br>inhibitory, induction of cell differentiation, nematicidal,<br>immunosuppressive, antiparasitic and cytotox., antibacterial, antioxidant,<br>osteoporosis inhibitor | 72-82 |
| 11-O-methylpseurotin A<br>(76) | <i>Aspergillus fumigatus</i> (030402d)        | Fungal | deep-sea marine sediment,<br>Vanuatu                                        | selectively inhibited a Hof1 deletion yeast strain                                                                                                                                                                                             | 67    |
|                                | <i>Aspergillus fumigatus</i> MR2012           |        | Red Sea sediment,<br>Hurghada, Egypt                                        |                                                                                                                                                                                                                                                | 89    |
| 14-norpseurotin A (77)         | <i>Aspergillus sydowii</i> PFW1-13            | Fungal | driftwood sample (PFW1),<br>Baishamen, Hainan, China,                       | significant antibacterial activities vs. <i>E. coli</i> , <i>B. subtilis</i> , and <i>M. ysoleiiticus</i> ,<br>MIC= 3.74, 14.97, 7.49 $\mu$ M                                                                                                  | 68    |
|                                | <i>Aspergillus fumigatus</i> YK-7             |        | marine mud, Bo Hai, China                                                   | mod. cytotox. U397, IC <sub>50</sub> = 22.8 $\mu$ M                                                                                                                                                                                            | 83    |
|                                | <i>Phoma</i> sp. NTOU4195                     |        | marine red alga<br><i>Pterocladia capillacea</i> ,<br>Taiwan, China         |                                                                                                                                                                                                                                                | 70    |
|                                | <i>Aspergillus fumigatus</i>                  |        | giant jellyfish <i>Neopilema nomurai</i> , Korea                            |                                                                                                                                                                                                                                                | 88    |
|                                |                                               |        |                                                                             | Antiparasitic, cytotox. vs. MCF-7                                                                                                                                                                                                              | 78    |
| Pseurotin A1 (78)              | <i>Aspergillus fumigatus</i> WFZ-25           | Fungal | holothurian <i>Stichopus japonicus</i> , Lingshan Island,<br>Qingdao, China |                                                                                                                                                                                                                                                | 84    |
|                                | <i>Aspergillus fumigatus</i> OUPS-<br>T106B-5 |        | marine fish <i>Mugil cephalus</i> ,<br>Katsuura Bay, Japan                  |                                                                                                                                                                                                                                                | 85    |
|                                | <i>Aspergillus fumigatus</i>                  |        | giant jellyfish <i>Neopilema nomurai</i> , Korea                            |                                                                                                                                                                                                                                                | 88    |
|                                | <i>Aspergillus fumigatus</i> YK-7             |        | marine mud, Bo Hai, China                                                   | mod. cytotox. vs. U397, IC <sub>50</sub> = 18.5 $\mu$ M                                                                                                                                                                                        | 83    |



|                       |                                           |        |                                                                          |                                                                   |       |
|-----------------------|-------------------------------------------|--------|--------------------------------------------------------------------------|-------------------------------------------------------------------|-------|
|                       | <i>Phoma</i> sp. NTOU4195                 |        | marine red alga<br><i>Pterocladiaella capillacea</i> ,<br>Taiwan, China  | mod. anti-inflammatory                                            | 70    |
| Pseurotin A2 (79)     | <i>Aspergillus fumigatus</i> WFZ-25       | Fungal | holothurian <i>Stichopus japonicus</i> , Lingshan Island, Qingdao, China | slightly cytotox.                                                 | 84    |
|                       | <i>Aspergillus fumigatus</i> MR2012       |        | Red Sea sediment, Hurghada, Egypt                                        | promising antiseizure                                             | 89    |
|                       | <i>Aspergillus fumigatus</i> OUPS-T106B-5 |        | marine fish <i>Mugil cephalus</i> , Katsuura Bay, Japan                  |                                                                   | 85    |
|                       | <i>Aspergillus fumigatus</i>              |        | giant jellyfish <i>Neopilema nomurai</i> , Korea                         |                                                                   | 88    |
|                       | <i>Phoma</i> sp. NTOU4195                 |        | marine red alga<br><i>Pterocladiaella capillacea</i> ,<br>Taiwan, China  | mod. anti-inflammatory                                            | 70    |
| Pseurotin A3 (80)     | <i>Phoma</i> sp. NTOU4195                 | Fungal | marine red alga<br><i>Pterocladiaella capillacea</i> ,<br>Taiwan, China  | mod. anti-inflammatory                                            | 70    |
| Pseurotin G (81)      | <i>Phoma</i> sp. NTOU4195                 | Fungal | marine red alga<br><i>Pterocladiaella capillacea</i> ,<br>Taiwan, China  | antiangiogenic, IC <sub>50</sub> =16.7 μM, mod. anti-inflammatory | 70    |
| Pseurotin D (82)      | <i>Aspergillus Fumigati</i>               | Fungal | sediment, Northeast Coast of Brazil                                      |                                                                   | 69    |
|                       |                                           |        |                                                                          | antagonistic, antiparasitic, and cytotox.                         | 73,83 |
| Pseurotin F2 (83)     | <i>Phoma</i> sp. NTOU4195                 | Fungal | marine red alga<br><i>Pterocladiaella capillacea</i> ,<br>Taiwan, China  |                                                                   | 70    |
|                       |                                           |        |                                                                          | Antagonistic, chitin synthase inhibitory                          | 74,86 |
| Azaspirofurane A (84) | <i>Aspergillus fumigatus</i> MR2012       | Fungal | Red Sea sediment, Hurghada, Egypt                                        | promising antiseizure                                             | 89    |
|                       | <i>Aspergillus sydowii</i> D2-6           |        | marine sediments, Jiaozhou Bay, China                                    | cytotox. vs. A549, IC <sub>50</sub> =10 μM                        | 87    |

|                       |                                                 |        |                                                                                   |                                                                                                                         |       |
|-----------------------|-------------------------------------------------|--------|-----------------------------------------------------------------------------------|-------------------------------------------------------------------------------------------------------------------------|-------|
| Azaspirofurane B (85) | <i>Aspergillus fumigatus</i>                    | Fungal | giant jellyfish <i>Neopilema nomurai</i> , Korea                                  | NF                                                                                                                      | 88    |
|                       | <i>Aspergillus fumigatus</i> MR2012             |        | Red Sea sediment, Hurghada, Egypt                                                 |                                                                                                                         | 89    |
|                       | <i>Aspergillus sydowii</i> D2-6                 |        | marine sediments, Jiaozhou Bay, China                                             |                                                                                                                         | 87    |
| Pseurotin F1 (86)     | <i>Aspergillus fumigatus</i>                    | Fungal | giant jellyfish <i>Neopilema nomurai</i> , Korea                                  | NF                                                                                                                      | 88    |
|                       | <i>Aspergillus fumigatus</i> MR2012             |        | Red Sea sediment, Hurghada, Egypt                                                 |                                                                                                                         | 89    |
|                       |                                                 |        |                                                                                   | antagonistic                                                                                                            | 69    |
| Pseurotin G' (87)     | <i>Aspergillus fumigatus</i> MR2012, co-culture | Fungal | Red Sea sediment, Hurghada, Egypt                                                 | ND                                                                                                                      | 90    |
| Cladosporicin A (88)  | <i>Cladosporium sphaerospermum</i> SW67         | Fungal | <i>Hydractinia echinata</i> (Cnidaria), a colony-forming hydrozoan, unknown place | weak cytotox. vs. 4 breast HCLs (70-90 $\mu$ M)                                                                         | 91    |
| Cephalimysin A (89)   | <i>Aspergillus fumigatus</i> OUPS-T106B-5       | Fungal | marine fish <i>Mugil cephalus</i> , Katsuura Bay, Japan,                          | significant cytotox. vs. P388 and HL-60 (IC <sub>50</sub> =15.0, 9.5 nM).                                               | 92    |
| Cephalimysin B (90)   | <i>Aspergillus fumigatus</i> OUPS-T106B-5       | Fungal | marine fish <i>Mugil cephalus</i> , Katsuura Bay, Japan,                          | NF                                                                                                                      | 93    |
| Cephalimysin C (91)   | <i>Aspergillus fumigatus</i> OUPS-T106B-5       | Fungal | marine fish <i>Mugil cephalus</i> , Katsuura Bay, Japan,                          | mod. cytotox. vs. P388 and HL-60 cell lines (IC <sub>50</sub> 48–61 $\mu$ M)                                            | 93    |
| Cephalimysin D (92)   | <i>Aspergillus fumigatus</i> OUPS-T106B-5       | Fungal | marine fish <i>Mugil cephalus</i> , Katsuura Bay, Japan,                          | mod. cytotox. vs. P388 and HL-60 cell lines (IC <sub>50</sub> 48–61 $\mu$ M)                                            | 93    |
| Cephalimysin E (93)   | <i>Aspergillus fumigatus</i> OUPS-T106B-5       | Fungal | marine fish <i>Mugil cephalus</i> , Katsuura Bay, Japan,                          | mod. cytotox. vs. 4 HTCLs (IC <sub>50</sub> 34-59 $\mu$ M)                                                              | 94-95 |
| Cephalimysin F (94)   | <i>Aspergillus fumigatus</i> OUPS-T106B-5       | Fungal | marine fish <i>Mugil cephalus</i> , Katsuura Bay, Japan,                          | mod. cytotox. vs. 4 HTCLs (IC <sub>50</sub> 55-63 $\mu$ M)                                                              | 94-95 |
| Cephalimysin G (95)   | <i>Aspergillus fumigatus</i> OUPS-T106B-5       | Fungal | marine fish <i>Mugil cephalus</i> , Katsuura Bay, Japan,                          | mod. cytotox. vs. 3 HTCLs (IC <sub>50</sub> 15-59 $\mu$ M), KB, IC <sub>50</sub> =11.1 $\mu$ M, equal to 5-fluorouracil | 94-95 |
| Cephalimysin H (96)   | <i>Aspergillus fumigatus</i> OUPS-T106B-5       | Fungal | marine fish <i>Mugil cephalus</i> , Katsuura Bay, Japan,                          | mod. cytotox. vs. 3 HTCLs (IC <sub>50</sub> 35-56 $\mu$ M), L1210, IC <sub>50</sub> =12.8 $\mu$ M                       | 94-95 |

|                              |                                             |              |                                                          |                                                                                                          |       |
|------------------------------|---------------------------------------------|--------------|----------------------------------------------------------|----------------------------------------------------------------------------------------------------------|-------|
| Cephalimysin I (97)          | <i>Aspergillus fumigatus</i> OUPS-T106B-5   | Fungal       | marine fish <i>Mugil cephalus</i> , Katsuura Bay, Japan, | mod. cytotox. vs. 3 HTCLs (IC <sub>50</sub> 31-69µM), L1210, IC <sub>50</sub> =14.3 µM                   | 94-95 |
| Cephalimysin J (98)          | <i>Aspergillus fumigatus</i> OUPS-T106B-5   | Fungal       | marine fish <i>Mugil cephalus</i> , Katsuura Bay, Japan, | mod. cytotox. vs. 4 HTCLs (IC <sub>50</sub> 51-58µM), KB-IC <sub>50</sub> =7 µM, equal to 5-fluorouracil | 94-95 |
| Cephalimysin K (99)          | <i>Aspergillus fumigatus</i> OUPS-T106B-5   | Fungal       | marine fish <i>Mugil cephalus</i> , Katsuura Bay, Japan, | mod. cytotox. vs. 4 HTCLs (IC <sub>50</sub> 22-57µM)                                                     | 94-95 |
| Cephalimysin L (100)         | <i>Aspergillus fumigatus</i> OUPS-T106B-5   | Fungal       | marine fish <i>Mugil cephalus</i> , Katsuura Bay, Japan, | mod. cytotox. vs. 4 HTCLs (IC <sub>50</sub> 52-61µM)                                                     | 94-95 |
| Cephalimysin M (101)         | <i>Aspergillus fumigatus</i> CUGBMF17018    | Fungal       | marine sediment, Bohai Sea, China                        | NF                                                                                                       | 97    |
| Cephalimysin N (102)         | <i>Aspergillus fumigatus</i> CUGBMF17018    | Fungal       | marine sediment, Bohai Sea, China                        | NF                                                                                                       | 97    |
| FD-838 (103)                 | <i>Aspergillus Fumigati</i>                 | Fungal       | sediment, Northeast Coast, Brazil                        |                                                                                                          | 77    |
|                              | <i>Aspergillus fumigatus</i> YK-7           |              | marine mud, Bo Hai, China                                | mod. cytotox. vs. U397, IC <sub>50</sub> = 25. 4µM                                                       | 84    |
|                              | <i>Aspergillus fumigatus</i> OUPS-T106B-5   |              | marine fish <i>Mugil cephalus</i> , Katsuura Bay, Japan, | mod. cytotox. vs. P388 and HL-60 (IC <sub>50</sub> 48–61 µM)                                             | 94-95 |
|                              | <i>Aspergillus fumigatus</i> CUGBMF17018    |              | marine sediment, Bohai Sea, China                        |                                                                                                          | 97    |
|                              |                                             |              |                                                          | differentiation of leukemic cell, antibacterial and antifungal                                           | 96    |
| Spirostaphylotrichin X (104) | <i>Cochliobolus lunatus</i> SCSIO41401      | Fungal       | marine alga, Yongxing Island, South China Sea,           | obvious Anti-influenza multi-virus strains, IC <sub>50</sub> = 1.2- 5.5µM, Targeting RNA Polymerase PB2  | 98    |
| Spirostaphylotrichin A (105) | <i>Cochliobolus lunatus</i> SCSIO41401      | Fungal       | marine alga, Yongxing Island, South China Sea,           | weak anti-influenzaa                                                                                     | 98    |
| Spirostaphylotrichin R (106) | <i>Cochliobolus lunatus</i> SCSIO41401      | Fungal       | marine alga, Yongxing Island, South China Sea,           | NF                                                                                                       | 98    |
| Triticone E (107)            | <i>Cochliobolus lunatus</i> SCSIO41401      | Fungal       | marine alga, Yongxing Island, South China Sea,           | NF                                                                                                       | 98    |
| Triticone D (108)            | <i>Westerdykella dispersa</i>               | Fungal       | Marine Sediment, South China Sea                         | NF                                                                                                       | 99    |
| Ikarugamycin (109)           | <i>Streptomyces zhaozhouensis</i> CA-185989 | Actinomycete | marine sediment, Utonde, Equatorial Guinea               | antifungal (MIC=4-8 µg/mL) and antibacterial vs. <i>MRSA</i> (MIC=2-4 µg/mL)                             | 106   |

|                                      |                                                                              |              |                                                                      |                                                                                                                                                                                                                                                                                                             |         |
|--------------------------------------|------------------------------------------------------------------------------|--------------|----------------------------------------------------------------------|-------------------------------------------------------------------------------------------------------------------------------------------------------------------------------------------------------------------------------------------------------------------------------------------------------------|---------|
|                                      | <i>Streptomyces zhaozhouensis</i> subsp. <i>mycale</i> . subsp. nov MCCB267. |              | marine sponge, <i>Mycale</i> sp., Rameswaram, Southeast Coast, India | promising cytotox. vs. NCI-H460 (IC <sub>50</sub> =1.43 µg/mL ) via apoptosis                                                                                                                                                                                                                               | 108     |
|                                      | <i>Streptomyces xiamenensis</i> 318                                          |              | mangrove sediment, Fujian, China                                     | cytotox. vs. pancreatic carcinoma, IC <sub>50</sub> =1.30µM.                                                                                                                                                                                                                                                | 109     |
|                                      | <i>Streptomyces</i> sp. SCSIO 40060                                          |              | marine sediment, South China Sea                                     | mod. cytotox. vs. 3 HCLs, IC <sub>50</sub> =1.96–6.87 µM.                                                                                                                                                                                                                                                   | 110     |
|                                      |                                                                              |              |                                                                      | potent antiprotozoal, antibacterial (Gram-positive Bacteria, including <i>MRSA</i> ), antifungal, antitumor activity, inhibition the uptake of oxidized low-density lipoprotein in macrophages, and inhibition HIV-1 Nef-induced CD4 cell surface downregulation, inhibition clathrin-dependent endocytosis | 103-113 |
| Butremycin (110)                     | <i>Micromonospora</i> sp. K310                                               | Actinomycete | mangrove river sediment, Ghanaian                                    | weak antibacterial                                                                                                                                                                                                                                                                                          | 114     |
| 28-N-Methylkarugamycin (111)         | <i>Streptomyces zhaozhouensis</i> CA-185989                                  | Actinomycete | marine sediment, Utonde, Equatorial Guinea                           | antifungal (MIC=4-8µg/mL) and antibacterial vs. <i>MRSA</i> (MIC=1-2µg/mL)                                                                                                                                                                                                                                  | 106     |
|                                      | <i>Streptomyces zhaozhouensis</i> subsp. <i>mycale</i> . subsp. nov MCCB267. |              | marine sponge, <i>Mycale</i> sp., Rameswaram, Southeast Coast, India | promising cytotox. vs. NCI-H460 (IC <sub>50</sub> = 1.78 µg/mL ) via apoptosis                                                                                                                                                                                                                              | 108     |
| Isoikarugamycin (112)                | <i>Streptomyces zhaozhouensis</i> CA-185989                                  | Actinomycete | marine sediment, Utonde, Equatorial Guinea                           | antifungal (MIC=2-8µg/mL) and antibacterial vs. <i>MRSA</i> (MIC=2-4µg/mL)                                                                                                                                                                                                                                  | 106     |
| 30-Oxo-28-N-Methylkarugamycin (113)  | <i>Streptomyces zhaozhouensis</i> subsp. <i>mycale</i> . subsp. nov MCCB267. | Actinomycete | marine sponge, <i>Mycale</i> sp., Rameswaram, Southeast Coast, India | promising cytotox. vs. NCI-H460 (IC <sub>50</sub> = 7.17 µg/mL ) via apoptosis                                                                                                                                                                                                                              | 108     |
| Clifednamide A (114)                 | <i>Streptomyces zhaozhouensis</i> subsp. <i>mycale</i> . subsp. nov MCCB267. | Actinomycete | marine sponge, <i>Mycale</i> sp., Rameswaram, Southeast Coast, India | promising cytotox. vs. NCI-H460 (IC <sub>50</sub> = 16.29 µg/mL ) via apoptosis                                                                                                                                                                                                                             | 108     |
| Capsimycin (115)                     | <i>Streptomyces</i> No. C 49-87                                              | Actinomycete |                                                                      | antifungal                                                                                                                                                                                                                                                                                                  | 115     |
|                                      | <i>Streptomyces xiamenensis</i> 318                                          |              | mangrove sediment, Fujian, China                                     | cytotox. vs. pancreatic carcinoma, IC <sub>50</sub> = 3.33µM.                                                                                                                                                                                                                                               | 109     |
|                                      | <i>Streptomyces</i> sp. SCSIO 40060                                          |              | marine sediment, South China Sea                                     | anti- <i>MRSA</i> , MIC = 16 mg/mL, cytotox. vs. several cancer cell lines, IC <sub>50</sub> = 2.62– 6.87 µM                                                                                                                                                                                                | 110     |
| Epoxykarugamycin/ Capsimycin B (116) | <i>Streptomyces xiamenensis</i> 318                                          | Actinomycete | mangrove sediment, Fujian, China                                     | cytotox. vs. pancreatic carcinoma, IC <sub>50</sub> =3.37µM.                                                                                                                                                                                                                                                | 109     |

|                               |                                                  |              |                                  |                                                                                                                                     |         |
|-------------------------------|--------------------------------------------------|--------------|----------------------------------|-------------------------------------------------------------------------------------------------------------------------------------|---------|
|                               | <i>Streptomyces</i> sp. SCSIO 40060              |              | marine sediment, South China Sea | mod. antimicrobial vs. 4 Bacterial MIC=8-16 µg/mL, mod. cytotox. vs. 3 HCLs, IC <sub>50</sub> =1.96–6.87 µM.                        | 110     |
|                               |                                                  |              |                                  | antibiotic activities vs. Gram-positive Bacteria and cytotox. vs. various HCLs.                                                     | 105     |
| Capsimycin C (117)            | <i>Streptomyces xiamenensis</i> 318              | Actinomycete | mangrove sediment, Fujian, China | weak cytotox.                                                                                                                       | 109     |
|                               | <i>Streptomyces</i> sp. SCSIO 40060              |              | marine sediment, South China Sea |                                                                                                                                     | 110     |
| Capsimycin D (118)            | <i>Streptomyces xiamenensis</i> 318              | Actinomycete | mangrove sediment, Fujian, China | weak cytotox.                                                                                                                       | 109     |
| Capsimycin E (119)            | <i>Streptomyces xiamenensis</i> 318              | Actinomycete | mangrove sediment, Fujian, China | weak cytotox.                                                                                                                       | 109     |
| Capsimycin F (120)            | <i>Streptomyces xiamenensis</i> 318              | Actinomycete | mangrove sediment, Fujian, China | weak cytotox.                                                                                                                       | 109     |
| Capsimycin G (121)            | <i>Streptomyces xiamenensis</i> 318              | Actinomycete | mangrove sediment, Fujian, China | ND                                                                                                                                  | 109     |
| Hydroxykarugamycin A (122)    | <i>Streptomyces</i> sp. SCSIO 40060              | Actinomycete | marine sediment, South China Sea | NF                                                                                                                                  | 110     |
| Hydroxykarugamycin B (123)    | <i>Streptomyces</i> sp. SCSIO 40060              | Actinomycete | marine sediment, South China Sea | NF                                                                                                                                  | 110     |
| Hydroxykarugamycin C (124)    | <i>Streptomyces</i> sp. SCSIO 40060              | Actinomycete | marine sediment, South China Sea | NF                                                                                                                                  | 110     |
| Chlokamycin (125)             | <i>Streptomyces</i> sp. MA2-12                   | Actinomycete | Marine, unknown                  | mod. cytotox. vs. Jurkat cells, HCT116, IC <sub>50</sub> =24.7, 33.5µM.                                                             | 116     |
| 16-Hydroxymaltophilin (126)   | <i>Actinoalloteichus cyanogriseus</i> WH1-2216-6 | Actinomycete | marine sediment, China           | mod. cytotox. vs. 6 HTCLs, IC <sub>50</sub> between 4.5 to 9.7µM. No AF active. vs. <i>Aspergillus fumigatus</i>                    | 117     |
| Maltophilin (127)             | <i>Actinoalloteichus cyanogriseus</i> WH1-2216-6 | Actinomycete | marine sediment, China           | mod. cytotox. vs. 6 HCLs IC <sub>50</sub> =1.9 ~ 5.4µM, potent AF active. vs. <i>Aspergillus fumigatus</i> MIC=6.12µM (3.125 µg/mL) | 117     |
| Xanthobaccin C (128)          | <i>Actinoalloteichus cyanogriseus</i> WH1-2216-6 | Actinomycete | marine sediment, China           | mod. cytotox. vs. 5 HCLs IC <sub>50</sub> =3.4 ~ 7.0 µM, weak AF active. vs. <i>Aspergillus fumigatus</i> MIC=25 µg/mL)             | 117     |
| Xanthobaccin C                | <i>Streptomyces</i> CMB-CS038                    | Actinomycete | cone snails, unknown             |                                                                                                                                     | 100     |
| FI-2 (129)                    | <i>Actinoalloteichus cyanogriseus</i> WH1-2216-6 | Actinomycete | marine sediment, China           | NF                                                                                                                                  | 117     |
| Dihydromaltophilin/HSAF (130) | <i>Actinoalloteichus cyanogriseus</i> WH1-2216-6 | Actinomycete | marine sediment, China           | mod. cytotox. vs. 7 HCLs IC <sub>50</sub> =0.1 ~ 4.9µM, potent AF activ. vs. <i>Aspergillus fumigatus</i> MIC=3.04µM (1.56 µg/mL)   | 117-119 |

|                                           |                                                  |              |                                                                            |                                                                                                                                                                                          |         |
|-------------------------------------------|--------------------------------------------------|--------------|----------------------------------------------------------------------------|------------------------------------------------------------------------------------------------------------------------------------------------------------------------------------------|---------|
|                                           | Streptomyces CMB-CS038                           |              | cone snails, unknown                                                       | antifungal vs. <i>Candida albicans</i> (IC <sub>50</sub> 3 μM) and cytotox. vs. human colon (SW-620, IC <sub>50</sub> 3.0 μM) and lung (NCI-H460, IC <sub>50</sub> 5 μM) carcinoma cells | 100     |
| 4-deoxy-dihydromaltophilin (131)          | <i>Actinoalloteichus cyanogriseus</i> WH1-2216-6 | Actinomycete | marine sediment, China                                                     | mod. cytotox. vs. 7 HCLs IC <sub>50</sub> =0.4 ~ 5.7 μM, weak AF active. vs. <i>Aspergillus fumigatus</i> MIC=25 μg/mL)                                                                  | 117     |
| F1-3 (132)                                | Streptomyces CMB-CS038                           | Actinomycete | cone snails, unknown                                                       | ND                                                                                                                                                                                       | 100     |
| Δ <sup>30</sup> -dihydromaltophilin (133) | Streptomyces CMB-CS038                           | Actinomycete | cone snails, unknown                                                       | ND                                                                                                                                                                                       | 100     |
| Pactamide A (134)                         | <i>Streptomyces pactum</i> SCSIO 02999           | Actinomycete | marine sediment, South China Sea                                           | Potent cytotox. vs. 4 HTCL, IC <sub>50</sub> between 0.24 - 0.51 μM                                                                                                                      | 120     |
| Pactamide B (135)                         | <i>Streptomyces pactum</i> SCSIO 02999           | Actinomycete | marine sediment, South China Sea                                           | Low cytotox. vs. 4 HTCL, IC <sub>50</sub> between 21.9 - 26.1 μM.                                                                                                                        | 120     |
| Pactamide C (136)                         | <i>Streptomyces pactum</i> SCSIO 02999           | Actinomycete | marine sediment, South China Sea                                           | Mod. cytotox. vs. 4 HTCL, IC <sub>50</sub> between 0.71 - 2.42 μM                                                                                                                        | 120     |
| Pactamide D (137)                         | <i>Streptomyces pactum</i> SCSIO 02999           | Actinomycete | marine sediment, South China Sea                                           | Low cytotox. vs. 4 HTCL, IC <sub>50</sub> between 14.5 - 19.3 μM.                                                                                                                        | 120     |
| Pactamide E (138)                         | <i>Streptomyces pactum</i> SCSIO 02999           | Actinomycete | marine sediment, South China Sea                                           | Mod. cytotox. vs. 4 HTCL, IC <sub>50</sub> between 5.1 - 8.7 μM                                                                                                                          | 120     |
| Pactamide F (139)                         | <i>Streptomyces pactum</i> SCSIO 02999           | Actinomycete | marine sediment, South China Sea                                           | Mod. cytotox. vs. 4 HTCL, IC <sub>50</sub> between 2.6 - 2.9 μM                                                                                                                          | 120     |
| Alteramide A (140)                        | <i>Alteromonas</i> sp.                           | Bacteria     | Marine Sponge <i>Halichondria okadai</i> , Nagai, Kanagawa, Japan          | cytotox.                                                                                                                                                                                 | 121     |
| Alteramide B (141)                        | <i>Alteromonas</i> sp.                           | Bacteria     | Marine Sponge <i>Halichondria okadai</i> , Nagai, Kanagawa, Japan          | NF                                                                                                                                                                                       | 121     |
| 6- <i>epi</i> -Alteramide A (142)         | <i>Pseudo Alteromonas</i> OT59                   | Bacteria     | gorgonian octocoral ( <i>Eunicea</i> sp.), Caribbean Panama, Pacific Ocean | dark-light-dependent antifungal                                                                                                                                                          | 122     |
| 6- <i>epi</i> -Alteramide B (143)         | <i>Pseudo Alteromonas</i> OT59                   | Bacteria     | gorgonian octocoral ( <i>Eunicea</i> sp.), Caribbean Panama, Pacific Ocean | dark-light-dependent antifungal                                                                                                                                                          | 122     |
| Aburatubolactam A (144)                   | Streptomyces sp. SCRC A-20                       | Actinomycete | mollusk, Aburatubo bay, Japan                                              | antioxidant, potent inhibited superoxide anion generation                                                                                                                                | 124     |
|                                           |                                                  |              |                                                                            | cytotox., antimicrobial, and inhibition of superoxide generation                                                                                                                         | 124-126 |

|                            |                                    |              |                                                       |                                                                                                                                                                                                                |     |
|----------------------------|------------------------------------|--------------|-------------------------------------------------------|----------------------------------------------------------------------------------------------------------------------------------------------------------------------------------------------------------------|-----|
| Aburatubolactam B (145)    | Streptomyces sp. SCRC A-20         | Actinomycete | mollusk, Aburatubo bay, Japan                         | antioxidant                                                                                                                                                                                                    | 124 |
| Aburatubolactam C (146)    | Streptomyces sp. SCRC A-20         | Actinomycete | mollusk, Aburatubo bay, Japan                         | cytotox. vs. 8 tumor cells (IC <sub>50</sub> =0.3-5.8 μg/mL) via inducing apoptosis                                                                                                                            | 125 |
| Pyrrospirone C (147)       | <i>Penicillium</i> sp. ZZ380       | Fungal       | wild sea crab <i>Pachygrapsus crassipes</i> , Unknown | anti-Bacterial activities vs. <i>MRSA</i> and <i>E. coli</i> . (MIC 4.0–5.0 μg/mL), mod. cytotox. vs. 4 glioma cells (IC <sub>50</sub> =10.03–22.12 μM)                                                        | 127 |
| Pyrrospirone D (148)       | <i>Penicillium</i> sp. ZZ380       | Fungal       | wild sea crab <i>Pachygrapsus crassipes</i> , Unknown | anti-Bacterial activities vs. <i>MRSA</i> and <i>E. coli</i> . (MIC 3–12 μg/mL), mod. cytotox. vs. 4 glioma cells (IC <sub>50</sub> =9.95–23.39 μM)                                                            | 127 |
| Pyrrospirone E (149)       | <i>Penicillium</i> sp. ZZ380       | Fungal       | wild sea crab <i>Pachygrapsus crassipes</i> , Unknown | anti-Bacterial activities vs. <i>MRSA</i> and <i>E. coli</i> . (MIC 10–11 μg/mL), mod. cytotox. vs. 4 glioma cells (IC <sub>50</sub> =15.76–26.64 μM)                                                          | 127 |
|                            | <i>Penicillium</i> sp. CPCC 400817 |              | mangrove plant, Dongzhai harbour, Hainan, China       | potent antibacterial vs. methicillin-susceptible and methicillin-resistant <i>Staphylococcus aureus</i> , MIC =12.9, 12.9 μg/mL                                                                                | 130 |
| Pyrrospirone F (150)       | <i>Penicillium</i> sp. ZZ380       | Fungal       | wild sea crab <i>Pachygrapsus crassipes</i> , Unknown | anti-Bacterial activities vs. <i>MRSA</i> and <i>E. coli</i> . (MIC 2.0–3.0 μg/mL), mod. cytotox. vs. 4 glioma cells (IC <sub>50</sub> =7.44–19.18 μM)                                                         | 127 |
|                            | <i>Penicillium</i> sp. CPCC 400817 |              | mangrove plant, Dongzhai harbour, Hainan, China       | potent antibacterial vs. methicillin-susceptible and methicillin-resistant <i>Staphylococcus aureus</i> , MIC =25.8, 25.8 μg/mL                                                                                | 130 |
| Pyrrospirone G (151)       | <i>Penicillium</i> sp. ZZ380       | Fungal       | wild sea crab <i>Pachygrapsus crassipes</i> , Unknown | potent cytotox. vs. 4 glioma cells (IC <sub>50</sub> =1.06–8.52 μM)                                                                                                                                            | 127 |
| Pyrrospirone H (152)       | <i>Penicillium</i> sp. ZZ380       | Fungal       | wild sea crab <i>Pachygrapsus crassipes</i> , Unknown | anti-Bacterial activities vs. <i>MRSA</i> and <i>E. coli</i> . (MIC 4–19 μg/mL), mod. cytotox. vs. 4 glioma cells (IC <sub>50</sub> =12.89–23.92 μM)                                                           | 127 |
| Pyrrospirone I (153)       | <i>Penicillium</i> sp. ZZ380       | Fungal       | wild sea crab <i>Pachygrapsus crassipes</i> , Unknown | anti-Bacterial activities vs. <i>MRSA</i> and <i>E. coli</i> . (MIC 2.0–4 μg/mL), mod. cytotox. vs. 4 glioma cells (IC <sub>50</sub> =7.44–19.18 μM)                                                           | 127 |
| Pyrrospirone J (154)       | <i>Penicillium</i> sp. ZZ380       | Fungal       | wild sea crab <i>Pachygrapsus crassipes</i> , Unknown | potent cytotox. vs. 2 human glioma cells, IC <sub>50</sub> =10.52–17.92 μM                                                                                                                                     | 129 |
| Penicypyrrodiether A (155) | <i>Penicillium</i> sp. ZZ380       | Fungal       | wild sea crab <i>Pachygrapsus crassipes</i> , Unknown | anti-Bacterial activities vs. <i>MRSA</i> (MIC=5.0 μg/mL), and <i>E. coli</i> (MIC=34 μg/mL), mod. anti-glioma, IC <sub>50</sub> = 11.32–29.10 μM,                                                             | 128 |
| Penicypyrroether A (156)   | <i>Penicillium</i> sp. ZZ380       | Fungal       | wild sea crab <i>Pachygrapsus crassipes</i> , Unknown | potent, selective cytotox. vs. 2 human glioma cells, IC <sub>50</sub> =1.64–5.50 μM, slightly stronger than p.c. Doxorubicin and antibacterial, MIC=1.7 μg/mL vs. <i>MRSA</i> and 3.0 μg/mL vs. <i>E. coli</i> | 129 |
| GKK1032A2 (157)            | <i>Penicillium</i> sp. CPCC 400817 | Fungal       | mangrove plant, Dongzhai harbour, Hainan, China       | potent antibacterial vs. methicillin-susceptible and methicillin-resistant <i>Staphylococcus aureus</i> , MIC =3.2, 3.2 μg/mL                                                                                  | 130 |
| GKK1032B (158)             | <i>Penicillium</i> sp. CPCC 400817 | Fungal       | mangrove plant, Dongzhai harbour, Hainan, China       | potent antibacterial vs. methicillin-susceptible and methicillin-resistant <i>Staphylococcus aureus</i> , MIC =3.2, 25.8 μg/mL                                                                                 | 130 |

|                          |                                     |               |                                                      |                                                                                                                                                                                         |     |
|--------------------------|-------------------------------------|---------------|------------------------------------------------------|-----------------------------------------------------------------------------------------------------------------------------------------------------------------------------------------|-----|
| GKK1032C (159)           | <i>Penicillium</i> sp. CCCC 400817  | Fungal        | mangrove plant, Dongzhai harbour, Hainan, China      | potent antibacterial vs. methicillin-susceptible and methicillin-resistant <i>Staphylococcus aureus</i> , MIC =3.2, 1.6 µg/mL                                                           | 130 |
| Trichobamide A (160)     | <i>Trichobotrys effuse</i> 4729     | Fungal        | ascidian, South China Sea                            | significant cytotox., anti-glioma                                                                                                                                                       | 131 |
| Ascomylactam A (161)     | <i>Didymella</i> sp. CYSK-4         | Fungal        | semi-mangrove <i>Pluchea indica</i> , Guangxi, China | mod. cytotox. vs. 6 HTCLs, IC <sub>50</sub> values in the range of 4.4-6.8 µM.                                                                                                          | 133 |
| Ascomylactam B (162)     | <i>Didymella</i> sp. CYSK-4         | Fungal        | semi-mangrove <i>Pluchea indica</i> , Guangxi, China | mod. cytotox. vs. 6 HTCLs, IC <sub>50</sub> values in the range of 4.5-20 µM.                                                                                                           | 133 |
| Ascomylactam C (163)     | <i>Didymella</i> sp. CYSK-4         | Fungal        | semi-mangrove <i>Pluchea indica</i> , Guangxi, China | mod. cytotox. vs. 6 HTCLs, IC <sub>50</sub> values in the range of 4.2-7.8 µM.                                                                                                          | 133 |
| Phomapyrrolidone A (164) | <i>Didymella</i> sp. CYSK-4         | Fungal        | semi-mangrove <i>Pluchea indica</i> , Guangxi, China | mod. cytotox. vs. 6 HTCLs, IC <sub>50</sub> values in the range of 12-29 µM.                                                                                                            | 133 |
|                          |                                     |               |                                                      | very weak antitubercular (MABA, LORA Test MIC=20.1, 41.1 µM) at subcytotox. concentrations.                                                                                             | 132 |
| Phomapyrrolidone C (165) | <i>Didymella</i> sp. CYSK-4         | Fungal        | semi-mangrove <i>Pluchea indica</i> , Guangxi, China | mod. cytotox. vs. 4 HTCLs, IC <sub>50</sub> values in the range of 25-30 µM.                                                                                                            | 133 |
|                          |                                     |               |                                                      | weak antitubercular (MABA, LORA Test MIC=5.2, 13.4 µM) at subcytotox. concentrations.                                                                                                   | 132 |
| Jamaicamide A (166)      | <i>Moorea producens</i> JHB         | Cyanobacteria | Hector Bay, Jamaica                                  | Cytotox. vs. 2 HTCLs LC <sub>50</sub> =15 µM, sodium channel-blocking 5µM                                                                                                               | 135 |
|                          | <i>Moorea producens</i> JHB         |               | Hector Bay, Jamaica                                  | concentration-dependent antagonism for the increase in neuronal [Ca <sup>2+</sup> ] <sub>i</sub> /[Na <sup>+</sup> ] <sub>i</sub> induced by veratridine, IC <sub>50</sub> =1.82, 1.1µM | 136 |
| Jamaicamide B (167)      | <i>Moorea producens</i> JHB         | Cyanobacteria | Hector Bay, Jamaica                                  | neurotoxic 5 ppm. Cytotox. vs. 2 HTCLs LC <sub>50</sub> =15µM, sodium channel-blocking 5µM                                                                                              | 135 |
|                          | <i>Moorea producens</i> JHB         |               | Hector Bay, Jamaica                                  | concentration-dependent antagonism for the increase in neuronal [Ca <sup>2+</sup> ] <sub>i</sub> /[Na <sup>+</sup> ] <sub>i</sub> induced by veratridine, IC <sub>50</sub> =6.88, 3.6µM | 136 |
| Jamaicamide C (168)      | <i>Moorea producens</i> JHB         | Cyanobacteria | Hector Bay, Jamaica                                  | neurotoxic 10 ppm. Cytotox. vs. 2 HTCLs LC <sub>50</sub> =15 µM sodium channel-blocking 5µM                                                                                             | 135 |
| Jamaicamide D (169)      | <i>Moorea producens</i> JHB         | Cyanobacteria | Hector Bay, Jamaica                                  | ND                                                                                                                                                                                      | 136 |
| Jamaicamide E (170)      | <i>Moorea producens</i> JHB         | Cyanobacteria | Hector Bay, Jamaica                                  | ND                                                                                                                                                                                      | 136 |
| Jamaicamide F (171)      | <i>Moorea producens</i> JHB         | Cyanobacteria | Hector Bay, Jamaica                                  | concentration-dependent antagonism for the increase in neuronal [Ca <sup>2+</sup> ] <sub>i</sub> /[Na <sup>+</sup> ] <sub>i</sub> induced by veratridine, IC <sub>50</sub> = 4.3, 2.3µM | 136 |
| Microcolin A (172)       | <i>Lyngbya majuscula</i>            | Cyanobacteria | shallow-water, Venezuelan                            | immunosuppressant EC <sub>50</sub> =1.5nM                                                                                                                                               | 137 |
|                          | <i>Lyngbya</i> cf. <i>polychroa</i> |               | shallow-water, Hollywood, Florida, USA               | cytotox. vs. HT-29, IMR-32, IC <sub>50</sub> = 0.28, 0.31nM                                                                                                                             | 138 |



|                                           |                          |               |                                                        |                                                                                                            |         |
|-------------------------------------------|--------------------------|---------------|--------------------------------------------------------|------------------------------------------------------------------------------------------------------------|---------|
|                                           | <i>Moorea producens</i>  |               | shallow-water, Playa Kalki, Curacao, Holland           | significant cytotox. vs. H-460, IC <sub>50</sub> =6, 5.0μM                                                 | 139,141 |
| Microcolin B (173)                        | <i>Lyngbya majuscula</i> | Cyanobacteria | shallow-water, Venezuelan                              | immunosuppressant EC <sub>50</sub> =42.7nM                                                                 | 137     |
|                                           |                          |               |                                                        | inhibit LFA-A/ICAM-1 mediated cell adhesion IC <sub>50</sub> = 0.15 μM                                     | 140     |
|                                           | Lyngbya cf. polychroa    |               | shallow-water, Hollywood, Florida, USA                 | inhibit the growth of HT-29 and IMR-32, IC <sub>50</sub> = 2.3, 7.7nM                                      | 138     |
|                                           | <i>Moorea producens</i>  |               | shallow-water, Playa Kalki, Curacao, Holland           | significant cytotox. vs. H-460, IC <sub>50</sub> =6, 5.0μM                                                 | 139     |
| Desacetylmicrocolin B /Microcolin C (174) | Lyngbya cf. polychroa    | Cyanobacteria | shallow-water, Hollywood, Florida, USA                 | inhibit the growth of HT-29 and IMR-32, IC <sub>50</sub> = 14nM                                            | 138     |
|                                           | <i>Moorea producens</i>  |               | shallow-water, Playa Kalki, Curacao, Holland           | significant cytotox. vs. H-460, IC <sub>50</sub> =6, 5.0μM                                                 | 139     |
| Microcolin D (175)                        | <i>Moorea producens</i>  | Cyanobacteria | shallow-water, Playa Kalki, Curacao, Holland           | significant cytotox. vs. H-460, IC <sub>50</sub> =6, 5.0μM                                                 | 139     |
|                                           |                          |               |                                                        | inhibit LFA-A/ICAM-1 mediated cell adhesion IC <sub>50</sub> = 0.9μM                                       | 140     |
| Microcolin E (176)                        | <i>Moorea producens</i>  | Cyanobacteria | shallow-water, Playa Kalki, Curacao, Holland           | significant cytotox. vs. H-460, IC <sub>50</sub> =6, 5.0μM                                                 | 139     |
| Microcolin F (177)                        | <i>Moorea producens</i>  | Cyanobacteria | shallow-water, Playa Kalki, Curacao, Holland           | significant cytotox. vs. H-460, IC <sub>50</sub> =6, 5.0μM                                                 | 139     |
| Microcolin G (178)                        | <i>Moorea producens</i>  | Cyanobacteria | shallow-water, Playa Kalki, Curacao, Holland           | significant cytotox. vs. H-460, IC <sub>50</sub> =6, 5.0μM                                                 | 139     |
| Microcolin H (179)                        | <i>Moorea producens</i>  | Cyanobacteria | shallow-water, Playa Kalki, Curacao, Holland           | significant cytotox. vs. H-460, IC <sub>50</sub> =6, 5.0μM                                                 | 139     |
| Microcolin I (180)                        | <i>Moorea producens</i>  | Cyanobacteria | shallow-water, Playa Kalki, Curacao, Holland           | significant cytotox. vs. H-460, IC <sub>50</sub> =6, 5.0μM                                                 | 139     |
| Microcolin J (181)                        | <i>Moorea producens</i>  | Cyanobacteria | shallow-water, Playa Kalki, Curacao, Holland           | significant cytotox. vs. H-460, IC <sub>50</sub> =6, 5.0μM                                                 | 139     |
| Microcolin K (182)                        | <i>Moorea producens</i>  | Cyanobacteria | shallow-water, Playa Kalki, Curacao, Holland           | significant cytotox. vs. H-460, IC <sub>50</sub> =6, 5.0μM                                                 | 139     |
| Microcolin L (183)                        | <i>Moorea producens</i>  | Cyanobacteria | shallow-water, Playa Kalki, Curacao, Holland           | significant cytotox. vs. H-460, IC <sub>50</sub> =6, 5.0μM                                                 | 139     |
| Majusculamide D (184)                     | <i>Moorea sp.</i>        | Cyanobacteria | shallow-water, agoon of Enewetak AtollPapua New Guinea | absolute configuration, selective and potent cytotox. ( PANC-1 and U251N, IC <sub>50</sub> = 0.32, 36.8nM) | 143     |

|                            |                           |               |                                                          |                                                                                      |         |
|----------------------------|---------------------------|---------------|----------------------------------------------------------|--------------------------------------------------------------------------------------|---------|
|                            | <i>Lyngbya majuscula</i>  |               | shallow-water, agoon of Enewetak Atoll, Papua New Guinea | mod. cytotox. vs. CCRF-CEM cell culture system at 0.2 pg/mL.                         | 142     |
| Deoxymajusculamide D (185) | <i>Lyngbya majuscula</i>  | Cyanobacteria | shallow-water, Marshall Islands, Western Pacific         | mod. cytotox. in the CCRF-CEM cell culture system at 0.2 pg/mL.                      | 142     |
| Ypaoamide (186)            | <i>Lyngbya majuscula</i>  | Cyanobacteria | Guam, Japan                                              | antifeedant, broadly acting feeding deterrent                                        | 144     |
| Ypaoamides B (187)         | <i>Okeania</i> sp.        | Cyanobacteria | shallow-water, Okinawa, Japan                            | antidiabetic, stimulated glucose uptake in cultured rat L6 myotubes via AMPK pathway | 145     |
| Ypaoamides C (188)         | <i>Okeania</i> sp.        | Cyanobacteria | shallow-water, Okinawa, Japan                            | antidiabetic, stimulated glucose uptake in cultured rat L6 myotubes.                 | 145     |
| Palmyrrolinone (189)       | Cyanobacterial assemblage | Cyanobacteria | Palmyra Atoll,                                           | molluscicidal                                                                        | 146     |
| Malyngamide A (190)        | <i>Moorea producens</i>   | Cyanobacteria | shallow-water, Red Sea, Egypt                            | weak cytotox.                                                                        | 153     |
|                            | <i>Lyngbya majuscula</i>  |               | shallow-water, Kahala Beach, Oahu, Hawaii, USA           |                                                                                      | 147-148 |
| Malyngamide B (191)        | <i>Moorea producens</i>   | Cyanobacteria | shallow-water, Red Sea, Egypt                            | mod. cytotox.                                                                        | 153     |
|                            | <i>Lyngbya majuscula</i>  |               | shallow-water, Kahala Beach, Oahu, Hawaii, USA           |                                                                                      | 147-148 |
| Pukeleimide A (192)        | <i>Lyngbya majuscula</i>  | Cyanobacteria | shallow-water, Kahala Beach, Oahu, USA                   | NF                                                                                   | 150     |
| Pukeleimide B (193)        | <i>Lyngbya majuscula</i>  | Cyanobacteria | shallow-water, Kahala Beach, Oahu, USA                   | NF                                                                                   | 150     |
| Pukeleimide C (194)        | <i>Lyngbya majuscula</i>  | Cyanobacteria | shallow-water, Kahala Beach, Oahu, USA                   | NF                                                                                   | 149     |
| Pukeleimide D (195)        | <i>Lyngbya majuscula</i>  | Cyanobacteria | shallow-water, Kahala Beach, Oahu, USA                   | NF                                                                                   | 150     |
| Pukeleimide E (196)        | <i>Lyngbya majuscula</i>  | Cyanobacteria | shallow-water, Kahala Beach, Oahu, USA                   | NF                                                                                   | 150     |
| Pukeleimide F (197)        | <i>Lyngbya majuscula</i>  | Cyanobacteria | shallow-water, Kahala Beach, Oahu, USA                   | NF                                                                                   | 150     |
| Pukeleimide G (198)        | <i>Lyngbya majuscula</i>  | Cyanobacteria | shallow-water, Kahala Beach, Oahu, USA                   | NF                                                                                   | 150     |
| Malyngamide Q (199)        | <i>Lyngbya majuscula</i>  | Cyanobacteria | shallow-water, madagascan                                | unstanble, NF                                                                        | 151     |

|                                    |                                       |               |                                                                  |                                                                                                                                                                                                            |         |
|------------------------------------|---------------------------------------|---------------|------------------------------------------------------------------|------------------------------------------------------------------------------------------------------------------------------------------------------------------------------------------------------------|---------|
| Malyngamide R (200)                | <i>Lyngbya majuscula</i>              | Cyanobacteria | shallow-water, madagascan                                        | modestly brine-shrimp toxic (LD <sub>50</sub> =18 ppm)                                                                                                                                                     | 151     |
| Isomalyngamide A (201)             | <i>Lyngbya majuscula</i>              | Cyanobacteria | Hawaiian waters, USA                                             | lethal toxicity to crayfish, IC <sub>50</sub> = 250 µg/kg                                                                                                                                                  | 152     |
|                                    | <i>Lyngbya majuscula</i>              |               | Taiwan, China                                                    | significantly suppressive effects on tumor migration ( serum-induced MDA-MB-231 IC <sub>50</sub> =60nM) rather than proliferation (IC <sub>50</sub> =4.6µM), inhibition of b1-integrin hypersialylation.   | 154     |
|                                    | <i>Lyngbya majuscula</i>              |               | Hawaiian waters, USA                                             | cytotox. vs. L1210, IC <sub>50</sub> =130 µM, and lethal toxicity vs. the shrimp <i>Palaemon paucidens</i> at an LD100 =4.25 mg/kg.                                                                        | 155     |
| Isomalyngamide B (202)             | <i>Lyngbya majuscula</i>              | Cyanobacteria | Hawaiian waters, USA                                             | lethal toxicity to crayfish at 500 µg/kg                                                                                                                                                                   | 155     |
|                                    | <i>Lyngbya majuscula</i>              |               | Hawaiian waters, USA                                             | cytotox. vs. L1210, IC <sub>50</sub> =30 µM and lethal toxicity vs. the shrimp <i>Palaemon paucidens</i> at an LD100 = 1.7 mg/kg.                                                                          | 152     |
| Malyngamide 4 (203)                | <i>Moorea producens</i>               | Cyanobacteria | shallow-water, Red Sea, Egypt                                    | mod. cytotox. `                                                                                                                                                                                            | 153     |
| Isomalyngamide A-1 (204)           | <i>Lyngbya majuscula</i>              | Cyanobacteria | Taiwan, China                                                    | significantly suppressive effects on tumor migration ( serum-induced MDA-MB-231 IC <sub>50</sub> =337nM) rather than proliferation (IC <sub>50</sub> =12.7µM), inhibition of b1-integrin hypersialylation. | 154     |
| New Malyngamide (205)              | <i>Lyngbya majuscula</i>              | Cyanobacteria | Hawaiian waters, USA                                             | cytotox. vs. L1210, IC <sub>50</sub> =2.9 µM and lethal toxicity vs. the shrimp <i>Palaemon paucidens</i> at an LD100 = 33.3 mg/kg.                                                                        | 155     |
| Palau'Imide (206)                  | <i>Lyngbya sp.</i>                    | Cyanobacteria | shallow-water, Palau, Japan                                      | cytotox. vs. KB, d LoVo cells, IC <sub>50</sub> = 1.4, 0.36 mM                                                                                                                                             | 156     |
| Belamide A (207)                   | <i>Symploca sp.</i>                   | Cyanobacteria | Florida                                                          | mod. cytotox. vs. HCT-116 (IC <sub>50</sub> =0.74µM), microtubule depolymerizing effects in A-10 cells at 20 µM                                                                                            | 157     |
| Caldoramide (208)                  | <i>Caldora penicillata</i>            | Cyanobacteria | Salmedina Reef, Panama                                           | mod. cytotox. for cells containing both oncogenic KRAS and HIF over the corresponding knockout cells.                                                                                                      | 158     |
| Gallinamide A/Symplostatin 4 (209) | <i>Schizothrix</i>                    | Cyanobacteria | tropical reef, Piedras Gallinas, Caribbean Coast of Panama       | antimalarial                                                                                                                                                                                               | 159-164 |
|                                    | <i>Symploca sp.</i>                   |               | shallow-water, Key Largo (Florida Keys), USA                     | cytotox., inhibits the human cysteine protease cathepsin L, inhibitor of FPs in infected RBCs                                                                                                              | 159-164 |
| Cyclopiazonic Acid (210)           | <i>Aspergillus flavus</i> C-F-3       | Fungal        | marine algae, Putian Pinghai, China                              | cytotox. vs. 4 HTCLs (IC <sub>50</sub> =2.4–21.5µM)                                                                                                                                                        | 169     |
|                                    | <i>Aspergillus flavus</i> OUCMDZ-2205 |               | Prawn, <i>Penaeus vannamei</i> , Lianyungang sea, Jiangsu, China |                                                                                                                                                                                                            | 170     |
|                                    | <i>Penicillium vinaceum</i>           |               | sponge <i>Hyrtios erectus</i> Yanbu, Red Sea, Egypt              | only antibacterial vs. E. coli and showed inhibition zone of 20 mm                                                                                                                                         | 184     |

|                                |                                       |              |                                                                  |                                                                                                                                                      |         |
|--------------------------------|---------------------------------------|--------------|------------------------------------------------------------------|------------------------------------------------------------------------------------------------------------------------------------------------------|---------|
|                                | <i>Penicillium commune</i> DFFSCS026  |              | deep-sea sediment, South China Sea                               | toxicity to brine shrimp, IC <sub>50</sub> <1.0ug/mL                                                                                                 | 181     |
|                                | <i>Penicillium cyclopium</i> Westling |              |                                                                  | most notably Ca <sup>2+</sup> -ATPase inhibition                                                                                                     | 166     |
|                                |                                       |              |                                                                  | immunosuppressive, antiviral activities vs. Sendai virus, hepatitis B virus, otavirus and human respiratory syncytial virus                          | 167-168 |
| cAATrp (211)                   | <i>Aspergillus oryzae</i> HMP-F28     | Fungal       | marine sponge<br><i>Hymeniacion perleve</i> , Bohai Sea, China   | ND                                                                                                                                                   | 174     |
| β-CPA (212)                    | <i>Aspergillus oryzae</i> HMP-F28     | Fungal       | marine sponge<br><i>Hymeniacion perleve</i> , Bohai Sea, China   | ND                                                                                                                                                   | 174     |
| Iso-α-Cyclopiazonic acid (213) | <i>Aspergillus flavus</i> C-F-3       | Fungal       | marine algae, Putian Pinghai, China                              | cytotox. vs. A549 (IC <sub>50</sub> =42.2μM)                                                                                                         | 169     |
|                                | <i>Aspergillus flavus</i> OUCMDZ-2205 |              | Prawn, <i>Penaeus vannamei</i> , Lianyungang sea, Jiangsu, China |                                                                                                                                                      | 170     |
| Amycocyclopiazonic acid (214)  | <i>Amycolatopsis</i> sp               | Actinomycete | sponge, <i>Micronesia</i> , Western Pacific                      | NF                                                                                                                                                   | 172     |
| Amycolactam (215)              | <i>Amycolatopsis</i> sp               | Actinomycete | sponge, <i>Micronesia</i> , Western Pacific                      | significant cytotox. vs. SNU638, HCT116 (IC <sub>50</sub> =0.8, 2.0 μM), mod. cytotox. vs. A546, K562, SK-HEP1 (IC <sub>50</sub> = 13.7, 9.6, 8.3μM) | 172     |
| Pseuboydone E (216)            | <i>Pseudallescheriabydii</i> F19-1    | Fungal       | soft coral <i>Lobophytum crassum</i> , Hainan Sanya, China       | ND                                                                                                                                                   | 173     |
| Cyclopiamide (217)             | <i>Aspergillus flavus</i> MXH-X104    | Fungal       | sponge <i>Agelas aff. nemoechinata</i> , Xisha Islands, China    | –                                                                                                                                                    | 179     |
|                                | <i>Penicillium commune</i> DFFSCS026  |              | deep-sea sediment, South China Sea                               | weak toxicity to brine shrimp (IC <sub>50</sub> =14.1–46.5 ug/mL), inactive vs. 2 HTCLs and H1N1 virus                                               | 181     |
| Cyclopiamide B (218)           | <i>Penicillium commune</i> DFFSCS026  | Fungal       | deep-sea sediment, South China Sea                               | weak toxicity to brine shrimp (IC <sub>50</sub> =14.1–46.5 ug/mL), inactive vs. 2 HTCLs and H1N2 virus                                               | 181     |
| Cyclopiamide C (219)           | <i>Penicillium commune</i> DFFSCS026  | Fungal       | deep-sea sediment, South China Sea                               | weak toxicity to brine shrimp (IC <sub>50</sub> =14.1–46.5 ug/mL), inactive vs. 2 HTCLs and H1N3 virus                                               | 181     |
| Cyclopiamide D (220)           | <i>Penicillium commune</i> DFFSCS026  | Fungal       | deep-sea sediment, South China Sea                               | weak toxicity to brine shrimp (IC <sub>50</sub> =14.1–46.5 ug/mL), inactive vs. 2 HTCLs and H1N4 virus                                               | 181     |

|                                              |                                      |        |                                                                     |                                                                                                                                                                                                                                                        |     |
|----------------------------------------------|--------------------------------------|--------|---------------------------------------------------------------------|--------------------------------------------------------------------------------------------------------------------------------------------------------------------------------------------------------------------------------------------------------|-----|
| Cyclopiamide E (221)                         | <i>Penicillium commune</i> DFFSCS026 | Fungal | deep-sea sediment, South China Sea                                  | weak toxicity to brine shrimp (IC <sub>50</sub> =14.1–46.5 ug/mL), inactive vs. 2 HTCLs and H1N5 virus                                                                                                                                                 | 181 |
| Cyclopiamide F (222)                         | <i>Penicillium commune</i> DFFSCS026 | Fungal | deep-sea sediment, South China Sea                                  | weak toxicity to brine shrimp (IC <sub>50</sub> =14.1–46.5 ug/mL), inactive vs. 2 HTCLs and H1N6 virus                                                                                                                                                 | 181 |
| Cyclopiamide G (223)                         | <i>Penicillium commune</i> DFFSCS026 | Fungal | deep-sea sediment, South China Sea                                  | weak toxicity to brine shrimp (IC <sub>50</sub> =14.1–46.5 ug/mL), inactive vs. 2 HTCLs and H1N7 virus                                                                                                                                                 | 181 |
| Cyclopiamide H/Speradine B Speradine G (224) | <i>Penicillium commune</i> DFFSCS026 | Fungal | deep-sea sediment, South China Sea                                  | NF                                                                                                                                                                                                                                                     | 181 |
|                                              | <i>Aspergillus oryzae</i>            |        | marine sediment, Min River, China                                   | NF                                                                                                                                                                                                                                                     | 178 |
|                                              | <i>Aspergillus oryzae</i>            |        | marine sediments, Langqi Island, Fujian, China                      | very weak cytotox. vs. HeLa IC <sub>50</sub> = 0.2 mM                                                                                                                                                                                                  | 177 |
| Cyclopiamide I/Aspergilline D (225)          | <i>Penicillium commune</i> DFFSCS026 | Fungal | deep-sea sediment, South China Sea                                  | weak toxicity vs. brine shrimp (IC <sub>50</sub> =14.1–46.5 ug/mL), inactive vs. 2 HTCLs and H1N8 virus                                                                                                                                                | 181 |
|                                              | <i>Aspergillus versicolor</i>        |        |                                                                     | Anti-TMV vs. Nicotiana tabacum Leaf 38.9μM, protective effect on the host plant, mod. cytotox. 5 HTCLs, IC <sub>50</sub> = 1.2 - 4.2 μM                                                                                                                | 182 |
| Cyclopiamide J (226)                         | <i>Penicillium commune</i> DFFSCS026 | Fungal | deep-sea sediment, South China Sea                                  | weak toxicity to brine shrimp (IC <sub>50</sub> =14.1–46.5 ug/mL), inactive vs. 2 HTCLs and H1N8 virus                                                                                                                                                 | 181 |
| Speradine A (227)                            | <i>Aspergillus tamaris</i> M143      | Fungal | driftwood, Okinawa, Japan                                           | inhibitory vs. Ca <sup>2+</sup> -ATPase (IC <sub>50</sub> 8 μM), inhibitory vs. histone deacetylase (IC <sub>50</sub> 100 ug/mL), and antibacterial vs. <i>Mycrococcus luteus</i> (MIC 16.7 ug/mL).                                                    | 175 |
| 3-OH-Speradine A (228)                       | <i>Aspergillus oryzae</i> HMP-F28    | Fungal | marine sponge Hymeniacidon perleve, Bohai Sea, China                | significant extracellular alkalinization coupled, H <sub>2</sub> O <sub>2</sub> production in tobacco suspensions. lethality-toxicity of brine shrimp LC <sub>50</sub> =39.7ug/mL, mod. cytotox. IC <sub>50</sub> =29.6-43.3μM, promoting plant growth | 174 |
| Speradine C (229)                            | <i>Aspergillus oryzae</i>            | Fungal | marine sediments, Langqi Island, Fujian, China                      | NF                                                                                                                                                                                                                                                     | 177 |
|                                              | <i>Aspergillus flavus</i> MXH-X104   |        | sponge <i>Agelas</i> aff. <i>nemochinata</i> , Xisha Islands, China | NF                                                                                                                                                                                                                                                     | 179 |
| Speradine D (230)                            | <i>Aspergillus oryzae</i>            | Fungal | marine sediments, Langqi Island, Fujian, China                      | NF                                                                                                                                                                                                                                                     | 177 |
| Speradine E (231)                            | <i>Aspergillus oryzae</i>            | Fungal | marine sediments, Langqi Island, Fujian, China                      | very weak cytotox. vs. HeLa, IC <sub>50</sub> = 0.2 mM                                                                                                                                                                                                 | 177 |
|                                              | <i>Penicillium commune</i> DFFSCS026 |        | deep-sea sediment, South China Sea                                  | NF                                                                                                                                                                                                                                                     | 181 |

|                                                 |                                          |        |                                                               |                                                                              |             |
|-------------------------------------------------|------------------------------------------|--------|---------------------------------------------------------------|------------------------------------------------------------------------------|-------------|
|                                                 | <i>Aspergillus oryzae</i>                |        | marine sediment, Min River, China                             | weak toxicity vs. brine shrimp, IC <sub>50</sub> =46.5 ug/mL                 | 178         |
| Speradine F-Speradine B<br>Penicamedine A (232) | <i>Pseudallescheriabooydii</i> F19-1     | Fungal | soft coral <i>Lobophytum crassum</i> , Hainan Sanya, China    | NF                                                                           | 173         |
|                                                 | <i>Aspergillus flavus</i> MXH-X104       |        | sponge <i>Agelas aff. nemoechinata</i> , Xisha Islands, China | NF                                                                           | 179         |
|                                                 | <i>Penicillium camemberti</i>            |        | unknown, southwestern Pacific Ocean                           | NF                                                                           | 171         |
| 2-Demethylsperadine F-Speradine B (233)         | <i>Penicillium dipodomycicola</i> Y26-02 | Fungal | mangrove <i>Clerodendrum inerme</i> , south China Sea         | weak anti-HIV                                                                | 180         |
| Speradine H (234)                               | <i>Aspergillus oryzae</i>                | Fungal | marine sediment, Min River, China                             | NF                                                                           | 178         |
|                                                 | <i>Penicillium commune</i> DFFSCS026     |        | deep-sea sediment, South China Sea                            | weak toxicity vs. brine shrimp (IC <sub>50</sub> =28.9 ug/mL)                | 181         |
| Speradine C'-Speradine C (235)                  | <i>Pseudallescheriabooydii</i> F19-1     | Fungal | soft coral <i>Lobophytum crassum</i> , Hainan Sanya, China    | significant cytotox. vs. Sf9 insect cells, IC <sub>50</sub> = 0.9 μM         | 173         |
|                                                 | <i>Aspergillus flavus</i> MXH-X104       |        | sponge <i>Agelas aff. nemoechinata</i> , Xisha Islands, China | NF                                                                           | 179         |
| Pyranonigrin A (236)                            | <i>Aspergillus niger</i> Van Tieghem     | Fungal | sponge <i>Axinella damicornis</i> , Mediterranean             | NF                                                                           | 185,188-191 |
|                                                 | <i>Aspergillus niger</i> LL-LV3020       |        | mangrove wood, Hong Kong, China                               | Revised                                                                      | 186         |
|                                                 | <i>Penicillium brocae</i> MA-231         |        | mangrove plants <i>Avicennia marina</i> , Hainan, China       | potent antibacterial vs. 7 human-, aqua-, and plant-pathogens (MIC=0.5μg/mL) | 187         |
| Pyranonigrin B (237)                            | <i>Aspergillus niger</i> Van Tieghem     | Fungal | sponge <i>Axinella damicornis</i> , Mediterranean             | NF                                                                           | 185         |
| Pyranonigrin C (238)                            | <i>Aspergillus niger</i> Van Tieghem     | Fungal | sponge <i>Axinella damicornis</i> , Mediterranean             | NF                                                                           | 185         |
| Pyranonigrin D (239)                            | <i>Aspergillus niger</i> Van Tieghem     | Fungal | sponge <i>Axinella damicornis</i> , Mediterranean             | ND                                                                           | 185         |

|                         |                                                  |        |                                                                                             |                                                                                                                               |                 |
|-------------------------|--------------------------------------------------|--------|---------------------------------------------------------------------------------------------|-------------------------------------------------------------------------------------------------------------------------------|-----------------|
| Pyranonigrin F (240)    | <i>Penicillium brocae</i> MA-231                 | Fungal | mangrove <i>Avicennia marina</i> ,<br>Hainan, China                                         | potent antibacterial vs. 7 human-, aqua-, and plant-pathogens<br>(MIC=0.5µg/mL)                                               | 187             |
| Pyranonigrin S (241)    | <i>Aspergillus niger</i> LL-LV3020               | Fungal | mangrove wood,<br>Hongkong, China                                                           | antioxidant                                                                                                                   | 186,188,190,191 |
| Nigrospine (242)        | <i>Nigrospora oryzae</i> SCSGAF 0111             | Fungal | coral gorgonian<br><i>Verrucellaum braculum</i> ,<br>South China Sea                        | ND                                                                                                                            | 192             |
| Vermelhotin (243)       | Pleosporale CRI247-01                            | Fungal | sponge, Surin Island,<br>Phangnga Province,<br>Thailand                                     | cytotox. vs. 11 HCLs (0.31–13.5µg/mL), mod. antiplasmodial (MIC 1-10 µM).<br>calmodulin inhibitor, anti-inflammatory, anti-TB | 194-197         |
| Cladosporiumin J (244)  | <i>Cladosporium sphaerospermum</i><br>EIODSF 008 | Fungal | deep-sea sediment, East<br>Indian Ocean                                                     | NF                                                                                                                            | 32              |
| Cladosporiumin K (245)  | <i>Cladosporium sphaerospermum</i><br>EIODSF 008 | Fungal | deep-sea sediment, East<br>Indian Ocean                                                     | NF                                                                                                                            | 32              |
| Cladosporiumin I (246)  | <i>Cladosporium sphaerospermum</i><br>EIODSF 008 | Fungal | deep-sea sediment, East<br>Indian Ocean                                                     | NF                                                                                                                            | 32              |
| Cladodionen (247)       | <i>Cladosporium</i> sp. OUCMDZ-1635              | Fungal | sponge, Xisha Islands,<br>South China Sea                                                   | cytotox. vs. MCF-7, HeLa, HCT-116, and HL-60 s, (IC <sub>50</sub> of 18.7, 19.1, 17.9,<br>9.1µM)                              | 198             |
|                         | <i>Cladosporium sphaerospermum</i> L3P3          |        | deep-sea sediment,<br>Mariana Trench                                                        | cytotox. vs. HL-60, K562 (IC <sub>50</sub> =4.5, 6.6 µM)                                                                      | 201             |
| Cladosporiumin A (248)  | <i>Cladosporium</i> sp. SCSIO z0025              | Fungal | deep-sea sediment,<br>Okinawa Trough, Japan                                                 | NF                                                                                                                            | 31              |
| Cladosporiumin B (249)  | <i>Cladosporium</i> sp. SCSIO z0025              | Fungal | deep-sea sediment,<br>Okinawa Trough, Japan                                                 | NF                                                                                                                            | 31              |
| Cladosporiumin C (250)  | <i>Cladosporium</i> sp. SCSIO z0025              | Fungal | deep-sea sediment,<br>Okinawa Trough, Japan                                                 | NF                                                                                                                            | 31              |
| Cladosporiumin D (251)  | <i>Cladosporium</i> sp. SCSIO z0025              | Fungal | deep-sea sediment,<br>Okinawa Trough, Japan                                                 | NF                                                                                                                            | 31              |
| Cladosporiumin I' (252) | <i>Cladosporium sphaerospermum</i><br>SW67       | Fungal | <i>Hydractinia echinata</i><br>(Cnidaria), a colony-<br>forming hydrozoan,<br>unknown place | weak cytotox. vs. 4 breast HCLs (70-90 µM)                                                                                    | 91              |
| Cladosporiumin J' (253) | <i>Cladosporium sphaerospermum</i><br>SW67       | Fungal | <i>Hydractinia echinata</i><br>(Cnidaria), a colony-                                        | weak cytotox. vs. 4 breast HCLs (70-90 µM)                                                                                    | 91              |

|                      |                                                  |              |                                              |                                                                                                                                                     |     |
|----------------------|--------------------------------------------------|--------------|----------------------------------------------|-----------------------------------------------------------------------------------------------------------------------------------------------------|-----|
|                      |                                                  |              | forming hydrozoan,<br>unknown place          |                                                                                                                                                     |     |
| Cladosin A (254)     | <i>Cladosporium sphaerospermum</i><br>2005-01-E3 | Fungal       | deep-sea sediment, Pacific<br>Ocean          | NF                                                                                                                                                  | 199 |
| Cladosin B (255)     | <i>Cladosporium sphaerospermum</i><br>2005-01-E3 | Fungal       | deep-sea sediment, Pacific<br>Ocean          | NF                                                                                                                                                  | 199 |
| Cladosin C (256)     | <i>Cladosporium sphaerospermum</i><br>2005-01-E3 | Fungal       | deep-sea sediment, Pacific<br>Ocean          | mild anti-virus (influenza A H1N1)                                                                                                                  | 199 |
| Cladosin D (257)     | <i>Cladosporium sphaerospermum</i><br>2005-01-E3 | Fungal       | deep-sea sediment, Pacific<br>Ocean          | NF                                                                                                                                                  | 199 |
| Cladosin F (258)     | <i>Cladosporium sphaerospermum</i><br>2005-01-E3 | Fungal       | deep-sea sediment, Pacific<br>Ocean          | NF                                                                                                                                                  | 199 |
| Cladosin G (259)     | <i>Cladosporium sphaerospermum</i><br>2005-01-E3 | Fungal       | deep-sea sediment, Pacific<br>Ocean          | NF                                                                                                                                                  | 199 |
| Cladosin H (260)     | <i>Cladosporium sphaerospermum</i> L3P3          | Fungal       | deep-sea sediment,<br>Mariana Trench         | NF                                                                                                                                                  | 201 |
| Cladosin I (261)     | <i>Cladosporium sphaerospermum</i> L3P3          | Fungal       | deep-sea sediment,<br>Mariana Trench         | cytotox. vs. HL-60/K562 (IC <sub>50</sub> =2.8 /4.1 μM)                                                                                             | 201 |
| Cladosin J (262)     | <i>Cladosporium sphaerospermum</i> L3P3          | Fungal       | deep-sea sediment,<br>Mariana Trench         | cytotox. vs. HL-60/K562 (IC <sub>50</sub> = 6.8 /7.8 μM)                                                                                            | 201 |
| Cladosin K (263)     | <i>Cladosporium sphaerospermum</i> L3P3          | Fungal       | deep-sea sediment,<br>Mariana Trench         | cytotox. vs. HL-60/K562 (IC <sub>50</sub> =5.9 /7.5 μM)                                                                                             | 201 |
| Tersone F (264)      | <i>Phomopsis tersa</i> fs441                     | Fungal       | deep-sea sediment, Indian<br>Ocean           | NF                                                                                                                                                  | 202 |
| Lajollamycin (265)   | <i>Streptomyces nodosus</i><br>(NPS007994)       | Actinomycete | marine sediment, Scripps,<br>California, USA | antibacterial vs. both drug-sensitive and -resistant Gram-positive Bacteria,<br>cytotox. inhibited the growth of B16-F10 (EC <sub>50</sub> =9.6 μM) | 203 |
|                      | <i>Streptomyces</i> sp. (SMC72)                  |              | seashore sediment, Jeju<br>Island, Korea     | mod. antifungal vs. <i>Candida albicans</i> IC <sub>50</sub> = 42 μM                                                                                | 204 |
| Lajollamycin B (266) | <i>Streptomyces</i> sp. (SMC72)                  | Actinomycete | seashore sediment, Jeju<br>Island, Korea     | mod. antifungal vs. <i>Candida albicans</i> IC <sub>50</sub> = 40 μM,                                                                               | 204 |
| Lajollamycin C (267) | <i>Streptomyces</i> sp. (SMC72)                  | Actinomycete | seashore sediment, Jeju<br>Island, Korea     | mod. antifungal vs. <i>Candida albicans</i> IC <sub>50</sub> =50 μM,                                                                                | 204 |
| Lajollamycin D (268) | <i>Streptomyces</i> sp. (SMC72)                  | Actinomycete | seashore sediment, Jeju<br>Island, Korea     | mod. antifungal vs. <i>Candida albicans</i> IC <sub>50</sub> = 120 μM,                                                                              | 204 |



|                                                                |                                                  |               |                                                |                                                                                                                           |         |
|----------------------------------------------------------------|--------------------------------------------------|---------------|------------------------------------------------|---------------------------------------------------------------------------------------------------------------------------|---------|
| Streptopyrrolidine (269)                                       | <i>Streptomyces</i> sp. KORDI-3973               | Actinomycete  | deep-sea sediment, Ayu Trough, western Pacific | anti-angiogenesis                                                                                                         | 205     |
| Spinnoxazine A (270)                                           | <i>Streptomyces spinoverrucosus</i>              | Actinomycete  | sand, Bahamas                                  | NF                                                                                                                        | 206     |
| Epolactaene (271)                                              | <i>Penicillium</i> sp. BM1689-P                  | Fungal        | sea sediment, Japan                            | neuritogenic arrests the cell cycle at the G0/G1 phase, induces the outgrowth of neurites in human neuroblastoma SH-SY5Y. | 207-208 |
|                                                                |                                                  |               |                                                | binds to Hsp60, inhibits Hsp60 chaperone, cytotox. induces apoptosis in a human leukemia B, BALL-1                        | 209-210 |
| Pulchellalactam (272)                                          | <i>Corollospora pulchella</i>                    | Fungal        | driftwood, Peleliu, Japan                      | CD45 Protein Tyrosine Phosphatase Inhibitor                                                                               | 211     |
| Hoshinolactam (273)                                            | <i>Oscillatoria</i>                              | Cyanobacteria | Coast near Hoshino, Okinawa, Japan             | potent antitrypanosomal (IC <sub>50</sub> =3.9 nM), out cytotox. vs. MRC-5 (IC <sub>50</sub> > 25μM).                     | 212     |
| 3- (2- Amino-Phenyl)-5-Methoxy-1, 5-Dihydro-Pyrrol-2-One (274) | <i>Rapidithrix thailandica</i> strain TISTR 1741 | Bacteria      | biofilm specimen, Andaman Sea, Thailand        | Antibacterial, selective inhibition vs. VRE (MIC = 5.97 μM)                                                               | 213     |
| Andrimid (275)                                                 | <i>Pseudomonas fluorescensi</i>                  | Bacteria      | marine tunicates                               | antibacterial                                                                                                             | 214     |
| Moiramides B (276)                                             | <i>Pseudomonas fluorescensi</i>                  | Bacteria      | marine tunicates                               | antibacterial                                                                                                             | 214     |
| Moiramides C (277)                                             | <i>Pseudomonas fluorescensi</i>                  | Bacteria      | marine tunicates                               | antibacterial                                                                                                             | 214     |

**Abbreviation:** cytotox. = cytotoxicity, vs. = against, mod. = moderate, HTCLs=human tumor cell lines, abs. = absolute, config. = configuration, MRSA = Methicillin-resistant *Staphylococcus aureus*, VRE = Vancomycin-Resistant *Enterococcus*, MRSE= Methicillin Resistant *Staphylococcus Epidermidis*, TB = *M.tuberculosis*, NF= not found or no test bioactivities, ND= not detected
